# Analysis of Expression, Cellular Localization, and Function of Three Inhibitors of Apoptosis (IAPs) from *Litopenaeus vannamei* during WSSV Infection and in Regulation of Antimicrobial Peptide Genes (AMPs)

Pei-Hui Wang<sup>1\*</sup>, Ding-Hui Wan<sup>1</sup>, Zhi-Hua Gu<sup>1</sup>, Wei Qiu<sup>2</sup>, Yong-Gui Chen<sup>2</sup>, Shao-Ping Weng<sup>1</sup>, Xiao-Qiang Yu<sup>3</sup>, Jian-Guo He<sup>1,2\*</sup>

**1** MOE Key Laboratory of Aquatic Product Safety/State Key Laboratory of Biocontrol, School of Life Sciences, Sun Yat-Sen University, Guangzhou, People's Republic of China, **2** School of Marine Sciences, Sun Yat-Sen University, Guangzhou, People's Republic of China, **3** Division of Cell Biology and Biophysics, School of Biological Sciences, University of Missouri-Kansas City, Kansas City, Missouri, United States of America

## Abstract

Inhibitors of apoptosis (IAPs) play important roles in apoptosis and NF- $\kappa$ B activation. In this study, we cloned and characterized three IAPs (LvIAP1-3) from the Pacific white shrimp, *Litopenaeus vannamei*. LvIAP1-3 proteins shared signature domains and exhibited significant similarities with other IAP family proteins. The tissue distributions of LvIAP1-3 were studied. The expression of LvIAP1-3 was induced in the muscle after white spot syndrome virus (WSSV) infection. LvIAP1 expression in the gill, hemocytes, hepatopancreas, and intestine was responsive to WSSV and *Vibrio alginolyticus* infections. LvIAP2 expression in the gill, hemocytes, and hepatopancreas was also responsive to WSSV infection. The expression of LvIAP3 in the gill, hemocytes, and intestine was reduced after *V. alginolyticus* infection. When overexpressed in *Drosophila* S2 cells, GFP labeled-LvIAP2 was distributed in the cytoplasm and appeared as speck-like aggregates in the nucleus. Both LvIAP1 and LvIAP3 were widely distributed throughout the cytoplasm and nucleus. The expression of LvIAP1, LvIAP2, and LvIAP3 was significantly knocked down by dsRNA-mediated gene silencing. In the gill of LvIAP1- or LvIAP3-silenced shrimp, the expression of WSSV VP28 was significantly higher than that of the dsGFP control group, suggesting that LvIAP1 and LvIAP3 may play protective roles in host defense against WSSV infection. Intriguingly, the LvIAP2-silenced shrimp all died within 48 hours after dsLvIAP2 injection. In the hemocytes of LvIAP2-silenced shrimps, the expression of antimicrobial peptide genes (AMPs), including *Penaeidins*, *lysozyme*, *crustins*, *Vibrio penaeicidae-induced cysteine and proline-rich peptides* (VICPs), was significantly downregulated, while the expression of anti-lipopolysaccharide factors (ALFs) was upregulated. Moreover, LvIAP2 activated the promoters of the NF- $\kappa$ B pathway-controlled AMPs, such as shrimp *Penaeidins* and *Drosophila drosomycin* and *attacin A*, in *Drosophila* S2 cells. Taken together, these results reveal that LvIAP1 and LvIAP3 might participate in the host defense against WSSV infection, and LvIAP2 might be involved in the regulation of shrimp AMPs.

**Citation:** Wang P-H, Wan D-H, Gu Z-H, Qiu W, Chen Y-G, et al. (2013) Analysis of Expression, Cellular Localization, and Function of Three Inhibitors of Apoptosis (IAPs) from *Litopenaeus vannamei* during WSSV Infection and in Regulation of Antimicrobial Peptide Genes (AMPs). PLoS ONE 8(8): e72592. doi:10.1371/journal.pone.0072592

**Editor:** Sebastian D. Fugmann, Chang Gung University, Taiwan

**Received:** March 18, 2013; **Accepted:** July 11, 2013; **Published:** August 14, 2013

**Copyright:** © 2013 Wang et al. This is an open-access article distributed under the terms of the Creative Commons Attribution License, which permits unrestricted use, distribution, and reproduction in any medium, provided the original author and source are credited.

**Funding:** This research was supported by National Natural Science Foundation of China under grant No. U1131002; the National High Technology Research and Development Program of China (973 Program) 2012CB114401; Technology Planning Project of Guangdong Province under number 2011A020102002, and China Agriculture Research System CARS-47. The funders had no role in study design, data collection and analysis, decision to publish, or preparation of the manuscript.

**Competing interests:** X-QY is a PLOS ONE Editorial Board member, and the authors also confirm that this does not alter the authors' adherence to all the PLOS ONE policies on sharing data and materials.

\* E-mail: wph326@gmail.com (P-HW); lsshjg@mail.sysu.edu.cn (J-GH)

## Introduction

Apoptosis is a genetically programmed process of controlled cell suicide that plays critical roles in organismal development, homeostasis, and the immune system through elimination of cells that are no longer useful [1]. The dysregulation of

apoptosis contributes to the pathogenesis of various diseases, such as cancers and autoimmunity [2,3]. Because of its destructive effect on living cells, apoptosis is tightly controlled by multiple regulators [4]. Inhibitors of apoptosis proteins (IAPs) inhibit the activity of caspases, the main executors of the apoptosis process, and play important roles in regulating the

progression of apoptosis from insects to humans [4,5]. IAP was first identified as a baculovirus gene that inhibits apoptosis in virus-infected *Spodoptera frugiperda* insect cells to enhance viral multiplication [5]. Since then, many IAP homologs have been identified in yeast, nematodes, flies, and mammals [5]. There are four and eight members of the IAP family in *Drosophila* and humans, respectively [5]. The IAP family proteins are characterized by the presence of one to three N-terminal zinc-binding baculoviral IAP repeat (BIR) domains [6]. These BIR domains bind directly to the caspases and inhibit their activities. Therefore, BIR domains are essential for the anti-apoptotic properties of IAPs [6]. Some IAPs also contain a C-terminal RING domain, which has ubiquitin E3 ligase activity [6]. The RING domain ubiquitinates the proteins that bind to IAPs, including caspases and IAPs themselves [6]. The ubiquitinated caspases are inactivated and the ubiquitinated IAPs are subjected to proteasome degradation [6].

In addition, IAPs also play important roles in immune signaling regulation from insects to mammals [6–8]. In *Drosophila*, the Toll and immune deficiency (IMD) pathways are the major regulators of the immune responses [9–11]. Gram-positive bacteria and fungi activate the Toll pathway, while Gram-negative bacterial infections activate the IMD pathway [9–11]. Activation of the Toll and IMD pathways initiates an intracellular signaling cascade to activate the NF- $\kappa$ B family proteins Dorsal/Dif and Relish, respectively, promoting the expression of immune-related genes, such as antimicrobial peptide genes (AMPs) [9–11]. Although no components of *Drosophila* Toll and IMD pathways have been identified as detectors for viral infections, viruses activate both pathways, which contribute to the restriction of viral replication [12–14]. Knock-down of *Drosophila* IAP2 (DIAP2) in insect cells reduced the expression of AMPs induced by Gram-negative bacteria, suggesting a role of DIAP2 in the IMD pathway [15–18]. The RNAi-mediated silencing of DIAP2 in the adult fat body also abrogated AMP gene expression induced by Gram-negative bacterial infection. Importantly, DIAP2 null flies exposed to Gram-negative bacteria did not activate the IMD pathway and died [15–18]. The exogenous expression of wild-type DIAP2, but not the E3-deficient RING mutant, rescued the DIAP2 null flies [16,18]. DIAP2 is required to sustain AMP expression in *Drosophila* S2 cells. However, the role of DIAP2 is limited to the IMD signaling, as DIAP2 null flies showed no defects in immune responses triggered via the Toll pathway, such as response against fungal infections [15–18]. Recently, it was reported that Gram-negative bacterial infections induce binding of DIAP2 to the caspase8 homolog DREDD, targeting it for polyubiquitination in a RING finger-dependent manner for Relish processing and subsequent AMP expression [19,20]. The functions of IAPs in defense against microbial infection and induction of NF- $\kappa$ B activity in mammals are evolutionarily conserved [7,8,21–24]. For example, mammalian cIAP-1, cIAP-2, and XIAP expressions are induced by NF- $\kappa$ B and contribute to NF- $\kappa$ B-mediated protection of some cells against TNF $\alpha$ -induced apoptosis [7,22,24]. However, the function of IAP2 in NF- $\kappa$ B activation is still unclear in other invertebrates, except *Drosophila*.

Infections with white spot syndrome virus (WSSV), one of the most common and destructive pathogens in shrimp aquaculture, result in 100% mortality of penaeid shrimp within 3–10 days. Both apoptosis and shrimp AMPs, including Penaeidins (PENs), crustins, and anti-lipopolysaccharide factors (ALFs), are important in the defense against WSSV infection [25–35]. Apoptosis induced by WSSV infection is important for successful WSSV pathogenesis [25–27,31]. To manipulate host apoptosis, WSSV modulates the expression of shrimp apoptosis-related genes, such as *PmCasp*, *PjCaspase*, *Pm-fortilin* and *VDAC*, to actively promote apoptosis to spread virus progeny to neighboring cells; in contrast, WSSV also encodes two anti-apoptosis proteins, AAP-1 (ORF390 or WSSV449) and WSSV222, to block apoptosis in order to prevent premature host cell death and maximize virus progeny [27–29,36–40]. The function of one shrimp IAP in regulating hemocyte apoptosis has been studied [41,42]; however, the roles of shrimp IAPs in defending against WSSV infection and regulating AMP expression through the NF- $\kappa$ B pathway remain unknown [41,42]. In this study, we cloned three IAPs from the model crustacean *Litopenaeus vannamei* and investigated the roles of these proteins during WSSV infection and in regulation of shrimp AMP expression.

## Materials and Methods

### 2.1: Shrimp culture

Healthy Pacific white shrimp (*L. vannamei*), approximately 4–5 g in body weight, were obtained for gene cloning and tissue distribution analysis, and those approximately 1–2 g in body weight were used for dsRNA-mediated gene silencing. All shrimp were purchased from a local shrimp farm in Zhuhai, Guangdong Province, China. The shrimp were cultured in a recirculating water tank system containing air-pumped seawater (2.5% salinity) at 24–26 °C and fed commercial feed at 5% of body weight twice a day, as previously described [43]. The shrimp were cultured for at least seven days to facilitate acclimation before the experiments were conducted.

### 2.2: RNA extraction and cDNA synthesis

Total RNA was extracted from the gill of *L. vannamei* using an RNeasy Mini Kit (Qiagen, Germany). Residual genomic DNA was removed using RNase-free DNase I (Qiagen, Germany). The cDNA template for rapid amplification of cDNA ends (RACE) PCR was prepared using a SMARTer™ RACE cDNA Amplification Kit (Clontech, USA). For gene cloning, first-strand cDNA was prepared using a PrimeScript™ 1st strand cDNA Synthesis Kit (Takara Bio, China). For the real-time quantitative PCR (qPCR) analysis, first-strand cDNA was prepared using a PrimeScript™ RT Reagent Kit (Takara Bio, China).

### 2.3: Rapid amplification of cDNA ends (RACE)

EST (expression sequence tag) sequences showing similarities to IAPs were identified using the NCBI EST database of *L. vannamei*. Based on the ESTs, we designed gene-specific primers (GSPs; listed in Table 1). The full-length

**Table 1.** PCR primers used in this study.

| Primer                      | Primer sequence (5'–3')                             |
|-----------------------------|-----------------------------------------------------|
| <b>cDNA cloning</b>         |                                                     |
| LviAP1-5' RACE1             | CATCCTATTGCCAGTTCATCC                               |
| LviAP1-5' RACE2             | TGACCTTGTCGGTTGCTTTG                                |
| LviAP1-3' RACE1             | GAAGATGGCTGCTGCTGG                                  |
| LviAP1-3' RACE2             | TGACTTGAAATGTACCGACAG                               |
| LviAP2-5' RACE1             | CGTCATCTCCTTTCTTCGTGTA                              |
| LviAP2-5' RACE2             | TCTCGTACCTCAGGCTATCGTA                              |
| LviAP2-3' RACE1             | ATGCCGAGATGGATGTTGTG                                |
| LviAP2-3' RACE2             | CTCAGTGCCCCATCTGTAGGA                               |
| LviAP3-5' RACE1             | TCATTCTAAAGTCAATCGTGCT                              |
| LviAP3-5' RACE2             | CTAAGTCATCAGGGGATAACCAAT                            |
| LviAP3-3' RACE1             | TGTTAATGAGCCAGATAGCACG                              |
| LviAP3-3' RACE2             | GCCACGTTACATTTGTAGGTCAG                             |
| <b>qPCR analysis</b>        |                                                     |
| qPCRLviAP1-F                | GAGATGAGCACAGAGGAAAAGAG                             |
| qPCRLviAP1-R                | ATGGATGAACTGGCAATAGGA                               |
| qPCRLviAP2-F                | CCCGCACTGTCCATTTATCA                                |
| qPCRLviAP2-R                | GCCTTGACGTTCCACATTCA                                |
| qPCRLviAP3-F                | GGAACATACCTTTGGTTAGGAGTC                            |
| qPCRLviAP3-R                | TCAATCGTGCTATCTGGCTCA                               |
| qPCRLvEF-1 $\alpha$ -F      | GAAGTAGCCGCGCTGGTTG                                 |
| qPCRLvEF-1 $\alpha$ -R      | CGGTTAGCCTTGGGGTTGAG                                |
| <b>dsRNA preparation*</b>   |                                                     |
| dsGFP-F                     | AGTGCTTCAGCCGCTACCC                                 |
| dsGFP-R                     | GCGCTTCTCGTTGGGGTC                                  |
| dsGFP(T7)-F                 | <u>TAATACGACTCACTATAGGAGTGCTTCAGCCGCTACCC</u>       |
| dsGFP(T7)-R                 | <u>TAATACGACTCACTATAGGGCGCTTCTCGTTGGGGTC</u>        |
| DsLviAP1-F                  | AGCAAGGGTTTGGAGAATTCT                               |
| dsLviAP1-R                  | ATGACAAAGGATAAAGAAAGAGAGG                           |
| dsLviAP1(T7)-F              | <u>TAATACGACTCACTATAGGAGCAAGGGTTTGGAGAATTCT</u>     |
| dsLviAP1(T7)-R              | <u>TAATACGACTCACTATAGGATGACAAAGGATAAAGAAAGAGAGG</u> |
| dsLviAP2-F                  | CGCTTGGTAGACAGGCTAAGAT                              |
| dsLviAP2-R                  | TACACGAAGAAAGGAGATGACG                              |
| dsLviAP2(T7)-F              | <u>TAATACGACTCACTATAGGCGCTTGGTAGACAGGCTAAGAT</u>    |
| dsLviAP2(T7)-R              | <u>TAATACGACTCACTATAGGTACACGAAGAAAGGAGATGACG</u>    |
| dsLviAP3-F                  | ATCACCTGTCTCCCATTACCT                               |
| dsLviAP3-R                  | TCATGAAGTGGGAGAAGGGTAA                              |
| dsLviAP3(T7)-F              | <u>TAATACGACTCACTATAGGATCACCTGTCTCCCATTACCT</u>     |
| dsLviAP3(T7)-R              | <u>TAATACGACTCACTATAGGTCATGAAGTGGGAGAAGGGTAA</u>    |
| <b>protein expression**</b> |                                                     |
| pA5.1LviAP1-F               | CGGGGTACCATGACAAAGGATAAAGAAAGAGAGG                  |
| pA5.1LviAP1-R               | GCTCTAGAAGCAAGGGTTTGGAGAATTCT                       |
| pA5.1LviAP2-F               | AAGGAAAAAGCGCCGCCGCCACCATGGGTGATATGTC-CCACGATC      |
| pA5.1LviAP2-F               | GCTCTAGAGGAGACAATAGGTTTGTGGTGAAT                    |
| pA5.1LviAP3-F               | CGGGGTACCATGGCTATTAGATGACCATATGG                    |
| pA5.1LviAP3-F               | GCTCTAGACTTTGGAATATTACCAACTGGTTTTTC                 |

\* T7 RNA polymerase binding site is underlined; \*\* primers used in the cellular localization and luciferase reporter assays were the same.

cDNA of LviAP1-3 were obtained using 5'- and 3'-RACE approach, as described in our previous studies [44–46].

#### 2.4: Cloning of novel *L. vannamei* AMPs

To examine the regulation of *L. vannamei* AMPs through *LviAP2*, novel shrimp AMPs, including *Lvlysozyme*, *Lvcrustin1-3*, *LvVICP1-2*, and *LvALF1-3*, were cloned

according to the EST sequences in NCBI database or using degenerated primers as previously described [44–47].

## 2.5: Amino acid sequence analysis

ScanProsite (<http://prosite.expasy.org/scanprosite/>) and a simple modular architecture research tool (SMART, <http://smart.embl-heidelberg.de>) were used to predict the domain structure of LvlAP1-3. Multiple sequence alignments were performed using the ClustalX 2.0 program. Neighbor-joining (NJ) phylogenetic trees were constructed using MEGA 4.0 software (<http://www.megasoftware.net/>). The bootstrap sampling was repeated 1,000 times.

## 2.6: Real-time qPCR analysis

Gram-negative *Vibrio alginolyticus* and WSSV inocula were prepared and quantified, as described in previous studies [45,48]. In the microbial challenge experiments, each *L. vannamei* was injected intramuscularly at the third abdominal segment with 100  $\mu$ l of *V. alginolyticus* inoculum (approximately  $7 \times 10^6$  CFU/shrimp) or with 100  $\mu$ l of WSSV inoculum (approximately  $10^7$  copies/shrimp). Phosphate-buffered saline (PBS)-injected shrimp were used as controls. At 0, 3, 6, 12, 24, 36, 48, and 72 hours post-injection (hpi), five shrimp from each group were randomly selected to harvest the gill, hemocytes, intestine, hepatopancreas, and muscle. Healthy *L. vannamei* tissues, including the hemocytes, eyestalk, gill, heart, hepatopancreas, stomach, intestine, nerve, muscle, pyloric caecum, and epithelium were collected for the tissue distribution analysis. Total RNA isolation and first-strand cDNA preparation were described in Section 2.2. The expressions of LvlAP1-3, WSSV VP28, *L. vannamei* AMPs (including LvPEN2, LvPEN3, LvPEN4, Lvlysozyme, Lvcrustin1, Lvcrustin2, Lvcrustin3, LvVICP1, LvVICP2, LvALF1, LvALF2, and LvALF3) were measured using qPCR by the relative standard curve method for calculation of changes in gene expression as described in previous studies [44,45]. The expression of *L. vannamei* elongation factor 1 $\alpha$  (LvEF-1 $\alpha$ ) was used as the internal control. Three replicate qPCRs were performed and three shrimp were analyzed per sample. The mRNA expression level in the untreated group (0 hpi) was set as 1.0. The standard curves for LvlAP1-3 and LvEF-1 $\alpha$  were generated through triplicate reactions of serially 10-fold dilutions (i.e., 10 different cDNA concentrations). The efficiencies for LvlAP1, LvlAP2, LvlAP3, and LvEF-1 $\alpha$  were 1.926, 1.940, 1.953, and 1.953, respectively.

## 2.7: Plasmid construction

To express LvlAP1-3 in *Drosophila* S2 cells for cellular localization and functional studies, the pAc5.1-LvlAP1-3 vectors were constructed using the pAc5.1/V5-His A vector (Invitrogen, USA) as previously described [44,47]. We constructed an expression plasmid, pAc5.1-N-GFP, which efficiently expresses green fluorescent protein (GFP) in *Drosophila* S2 cells, as described in our previous studies [44,45]. The complete LvlAP1-3 open reading frames (ORFs) were inserted into the pAc5.1-N-GFP vector to create the pAc5.1-LvlAP1-3-GFP, expressing full-length LvlAP1-3 fused with GFP. The luciferase reporter vectors, including pGL3-

PEN453, pGL3-PEN309, pGL3-PEN4, pGL3-Drs, pGL3-AttA, pGL3-WSSV069, pGL3-WSSV303, and pGL3-WSSV371, had been constructed in previous studies [44,47] and were predominantly regulated through NF- $\kappa$ B activation [45,47,49–52]. The promoter sequences of PEN453, PEN309, PEN4, Drs, AttA, WSSV069, WSSV303, and WSSV371 are provided in Figure S1.

## 2.8: Cell culture

Because no immortalized shrimp cell line is currently available, *Drosophila Schneider* 2 (S2) cells (Invitrogen), derived from a macrophage-like lineage, were used to analyze the cellular localization and function of LvlAP1-3. *Drosophila* S2 cells were maintained at 28 °C in Schneider's *Drosophila medium* (SDM) (Invitrogen) without CO<sub>2</sub> and supplemented with 10% fetal bovine serum (FBS). When the culture density reached  $6\text{--}20 \times 10^6$  viable cells ml<sup>-1</sup>, the *Drosophila* S2 cells were passaged onto a new plate at a density of  $5 \times 10^5$  viable cells ml<sup>-1</sup>.

## 2.9: Cellular localization analysis

*Drosophila* S2 cells were seeded onto poly-L-lysine-treated coverslips in 24-well plates at 24 hours before transfection. pAc5.1-LvlAP1-3-GFP were transfected into *Drosophila* S2 cells using Effectene Transfection Reagent (Qiagen, Germany) according to the manufacturer's protocol. Thirty-six hours after transfection, the cells on the coverslips were washed twice with PBS, fixed in Immunol Staining Fix Solution (Beyotime, China) and stained with Hoechst 33258 (Beyotime, China). The coverslips were subsequently examined for protein cellular localization using a Leica laser scanning confocal microscope as previously described [45–47].

## 2.10: Dual luciferase reporter assays

*Drosophila* S2 cells were seeded onto a 96-well culture plates in 100  $\mu$ l medium at  $2 \times 10^5$  cells ml<sup>-1</sup> for 24 hours prior to transfection. To examine whether LvlAP2 affects the promoter activities of NF- $\kappa$ B-controlled AMPs, the expression vector pAc5.1-LvlAP2 (0.05  $\mu$ g per well) was cotransfected with the luciferase reporter gene pGL3-Basic, pGL3-PEN453, pGL3-PEN309, pGL3-PEN4, pGL3-Drs or pGL3-AttA (0.05  $\mu$ g per well) as described in our previous studies [44,47]. The pRL-TK *Renilla* luciferase vector was used as an internal control. The cells were harvested and lysed at 36 hours after transfection to examine luciferase activities using the Dual-Luciferase Reporter Assay System (Promega, USA).

## 2.11: Preparation of dsRNA and gene silencing through dsRNA injection in vivo

The double-stranded RNAs (dsRNAs) of LvlAP1-3 and GFP (were prepared using T7 RiboMAX Express Kit (Promega, USA) as previous described [43]. Briefly, DNA templates for the production of dsLvlAP1-3 and dsGFP were PCR amplified using gene-specific primers with the T7 RNA polymerase binding site at the 5' terminus to produce sense and anti-sense RNA strands separately. The single-stranded RNA was annealed to generate dsRNA. After purification, the dsRNA

was quantified and stored at  $-80^{\circ}\text{C}$ . For the dsRNA-mediated gene silencing experiments, the experimental group (1–2 g per shrimp) was treated with dsLvIAP1, dsLvIAP2 or dsLvIAP3 (1  $\mu\text{g/g}$  shrimp) through intramuscular injection, while the control groups were injected with dsGFP and PBS, respectively. To determine the silencing effects, the gill samples from at least three shrimp from each treatment were collected at 0, 24, 72, 120, and 144 hours post-dsRNA injection (hpi), and the total RNA was extracted. The total RNA from the gills of dsRNA-injected *L. vannamei* was reverse-transcribed into the first-strand cDNA to assess the gene silencing efficiency. For LvIAP2, the hemocytes were collected to assess the gene silencing efficiency because we did not observe an obvious reduction in gene expression in the gill of dsLvIAP2-injected shrimps.

### 2.12. The expression level of endogenous *L. vannamei* AMPs in dsLvIAP2-injected shrimp

The expression levels of *L. vannamei* PENs, lysozyme, crustins, VICPs, and ALFs (LvPEN2, LvPEN3, LvPNE4, Lvlysozyme, Lvcrustin1, Lvcrustin2, Lvcrustin3, LvVICP1, LvVICP2, LvALF1, LvALF2, and LvALF3) were detected using the cDNA templates prepared from the hemocytes of dsLvIAP2-injected shrimps by qPCR as described in Section 2.5.

### 2.13: The WSSV infection experiments in dsRNA-injected *L. vannamei*

The efficiency of gene silencing in dsLvIAP1- and dsLvIAP3-injected *L. vannamei* was significant compared with that of the control groups (> 80%) at all examined time points selected for qPCR analysis. In the WSSV infection experiments, *L. vannamei* were intramuscularly infected with a WSSV inoculum (approximately  $10^7$  copies/shrimp) at 48 hours after dsRNA injection and the gills were collected at 0, 3, 6, 12, 24, 36, and 48 hpi to assess WSSV VP 28 expression.

### 2.14: Statistical analyses

The data are presented as the means  $\pm$  standard error of the mean (SEM). Student's t-test was used to compare the means of two samples using Microsoft Excel. The chi-square statistical analysis was performed to assess differences in the mortality rates through a comparison of the mortality of the dsLvIAP2 injection group with that of the PBS or dsGFP-injected group. In all cases, the differences were considered statistically significant at  $p < 0.05$  and highly significant at  $p < 0.01$ .

## Results

### 3.1: Cloning and sequence analysis of LvIAP1-3, Lvlysozyme, Lvcrustin1-3, LvALF1-3, and LvVICP1-2

Based on the EST sequences of *L. vannamei* in the NCBI database, the full-length cDNAs of three novel *L. vannamei* IAPs (LvIAP1-3) were cloned. LvIAP1 cDNA was 879 bp with an ORF of 420 bp, encoding a putative protein of 139 amino acids, a 5' untranslated region of 79 bp, and a 3' untranslated region of 380 bp (Figure 1A). LvIAP2 cDNA was 3,166 bp with an ORF of 2,100 bp, encoding a putative protein of 699 amino

acids, a 5' untranslated region of 593 bp, and a 3' untranslated region of 473 bp (Figure 1B). LvIAP3 cDNA was 2,219 bp with an ORF of 1,176 bp, encoding a putative protein of 496 amino acids, a 5' untranslated region of 59 bp, and a 3' untranslated region of 399 bp (Figure 1C).

LvIAP1 contains one BIR domain and shares 38% and 29% identities to human survivin and *Drosophila* Deterin, respectively (Figure 1D). LvIAP2 contains three BIR domains and a C-terminal RING domain, and is 27% and 30% identical to *Drosophila* IAP1 and IAP2, respectively (Figure 1D). LvIAP3 is a completely novel member of the IAP family proteins, possessing two BIR domains, and it is not similar to any known IAPs (Figure 1D).

To investigate the regulation of shrimp AMPs through LvIAP2 *in vivo*, one novel Lvlysozyme, three novel Lvcrustins, three novel LvALFs, and two novel LvVICPs were cloned. LvVICPs (*Vibrio penaeicidae*-induced cysteine and proline-rich peptides) are homologs of Stylicins in Pacific blue shrimp *Litopenaeus stylirostris*, which are new members of the recently identified shrimp AMPs with strong antifungal activity against *Fusarium oxysporum*, a pathogenic fungus of shrimp. The sequences of Lvlysozyme, Lvcrustin1-3, LvALF1-3, and LvVICP1-2 are provided in Figure S2.

### 3.2: Phylogenetic tree construction

Using MEGA 4.0 software, we constructed NJ phylogenetic trees for IAPs from typical species. The NJ phylogenetic tree revealed two groups of shrimp IAPs: LvIAP1 and LvIAP3 were clustered with Dmdeterin and Hssurvivin in one group, and LvIAP2 clustered with DmlIAP2 in another group (Figure 2).

### 3.3: Tissue distribution of LvIAP1-3 in healthy *L. vannamei*

In healthy shrimp, when normalized to mRNA expression in the hepatopancreas (1.00-fold), LvIAP1 was expressed at higher levels in the intestine (1.14-fold), epithelium (1.25-fold), hemocytes (1.34-fold), eyestalk (1.39-fold), gill (3.51-fold), heart (4.69-fold), pyloric cecum (7.64-fold), nerve (8.55-fold), stomach (17.42-fold), and muscle (30.34-fold) (Figure 3A), LvIAP2 was expressed at higher levels in the stomach (1.14-fold), hemocytes (1.33-fold), eyestalk (1.70-fold), intestine (1.84-fold), pyloric cecum (2.09-fold), epithelium (2.27-fold), gill (3.34-fold), nerve (4.78-fold), heart (5.72-fold), and muscle (17.09-fold) (Figure 3B), LvIAP3 was expressed at higher levels in the intestine (1.32-fold), hemocytes (1.50-fold), stomach (1.99-fold), eyestalk (1.91-fold), epithelium (2.07-fold), pyloric cecum (3.11-fold), gill (4.12-fold), nerve (4.84-fold), heart (8.71-fold), and muscle (37.15-fold) (Figure 3C). LvIAP1-3 mRNAs were expressed at significantly higher levels in the muscle but at lowest levels in the hepatopancreas.

### 3.4: Expression profiles of LvIAP1-3 after microbial challenge

After WSSV infection, LvIAP1 was upregulated in the gill, hemocytes, and intestine compared with the PBS-injected group (Figure 4A–D); LvIAP2 was also upregulated in the gill, hemocytes, and hepatopancreas (Figure 4F–H); but LvIAP3 was only slightly upregulated in the gill and intestine (Figure 4I–



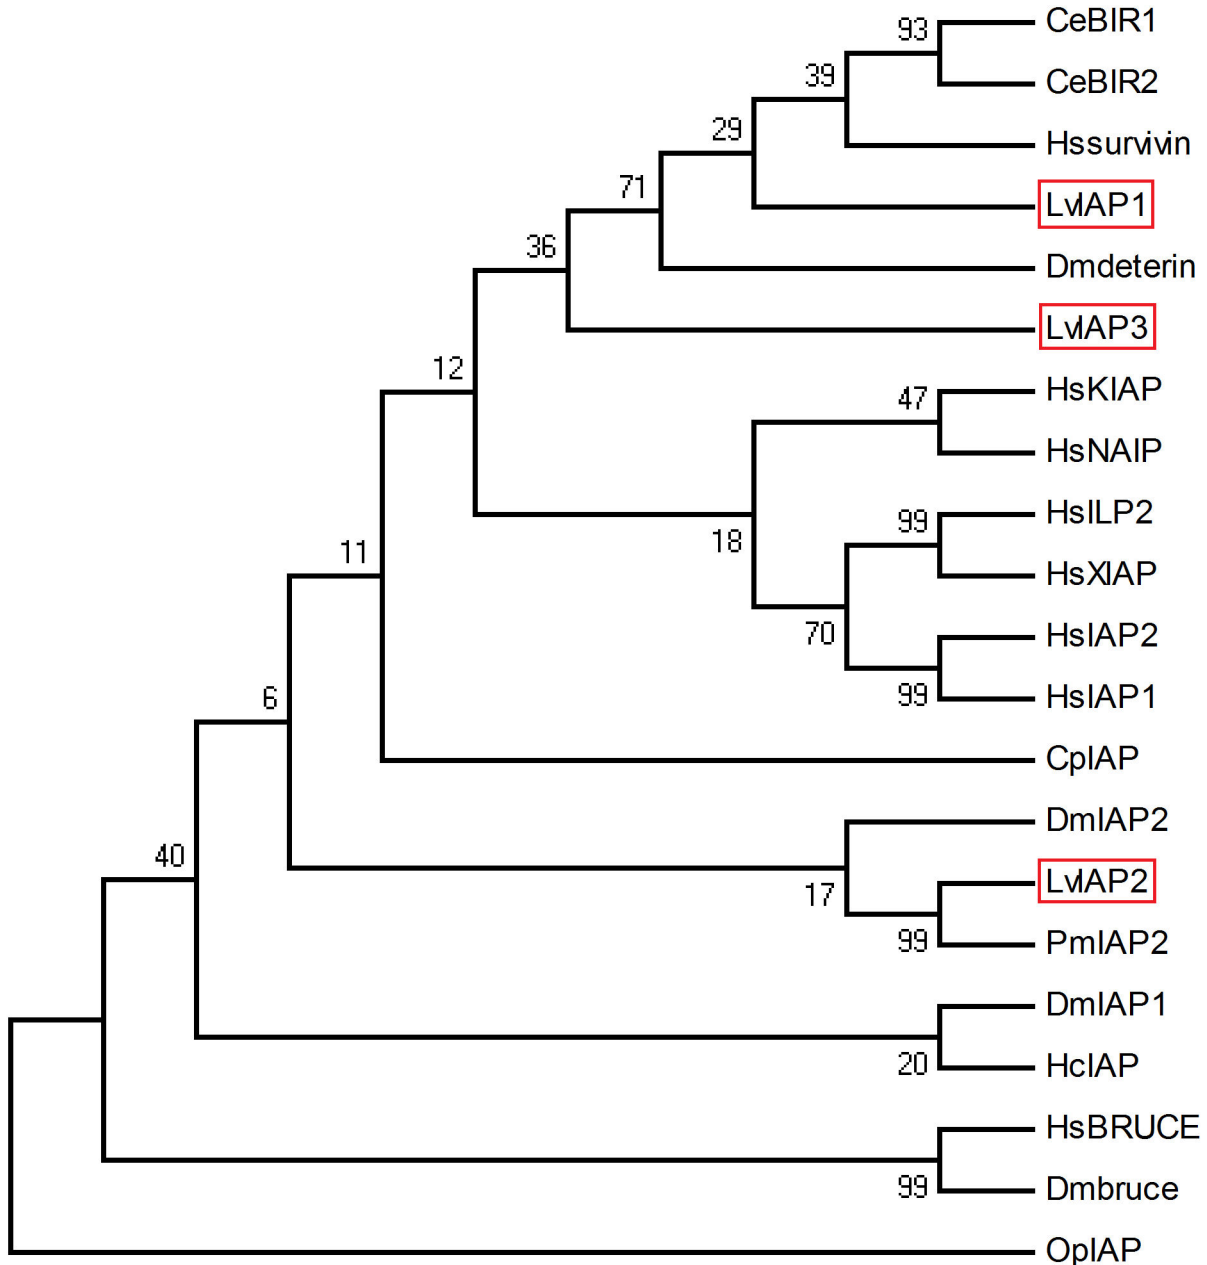

**Figure 2. A phylogenetic tree of LviAP1-3 with other IAPs.** The numbers at the nodes indicate the bootstrap values. LviAP1-3 are boxed with red lines. LviAP1, *L. vannamei* IAP1 (Accession no. [AGC24178](#)); LviAP2, *L. vannamei* IAP2 (Accession no. [AGC24179](#)); LviAP3, *L. vannamei* IAP3 (Accession no. [AGC24180](#)); PmiAP2, *Penaeus monodon* IAP2 (Accession no. [ABO38431](#)); Hssurvivin, *Homo sapiens* survivin (Accession no. [NP\\_001125727](#)); HsILP2, *H. sapiens* ILP2 (Accession no. [NP\\_203127](#)); HsKIAP, *H. sapiens* KIAP (Accession no. [NP\\_647478](#)); HsXIAP, *H. sapiens* XIAP (Accession no. [NP\\_001158](#)); HsIAP2, *H. sapiens* IAP2 (Accession no. [NP\\_001157](#)); HsIAP1, *H. sapiens* IAP1 (Accession no. [XP\\_003910644](#)); HsNAIP, *H. sapiens* NAIP (Accession no. [AAC62261](#)); HsBRUCE, *H. sapiens* BRUCE (Accession no. [XP\\_004029135](#)); DmiAP1, *Drosophila melanogaster* IAP1 (Accession no. [NP\\_524101](#)); DmiAP2, *D. melanogaster* IAP2 (Accession no. [Q24307](#)); Dmdeterin, *D. melanogaster* deterin (Accession no. [NP\\_650608](#)); Dmbruce, *D. melanogaster* bruce (Accession no. [NP\\_649995](#)); CeBIR1, *Caenorhabditis elegans* BIR1 (Accession no. [NP\\_506362](#)); CeBIR2, *C. elegans* BIR2 (Accession no. [NP\\_505949](#)); HciAP, *Hyphantria cunea* nucleopolyhedrovirus IAP (Accession no. [YP\\_473308](#)); OplAP, *Orgyia pseudotsugata* MNPV IAP (Accession no. [NP\\_046191](#)); CpiAP, *Cydia pomonella* granulovirus IAP (Accession no. [NP\\_148878](#)).

doi: 10.1371/journal.pone.0072592.g002

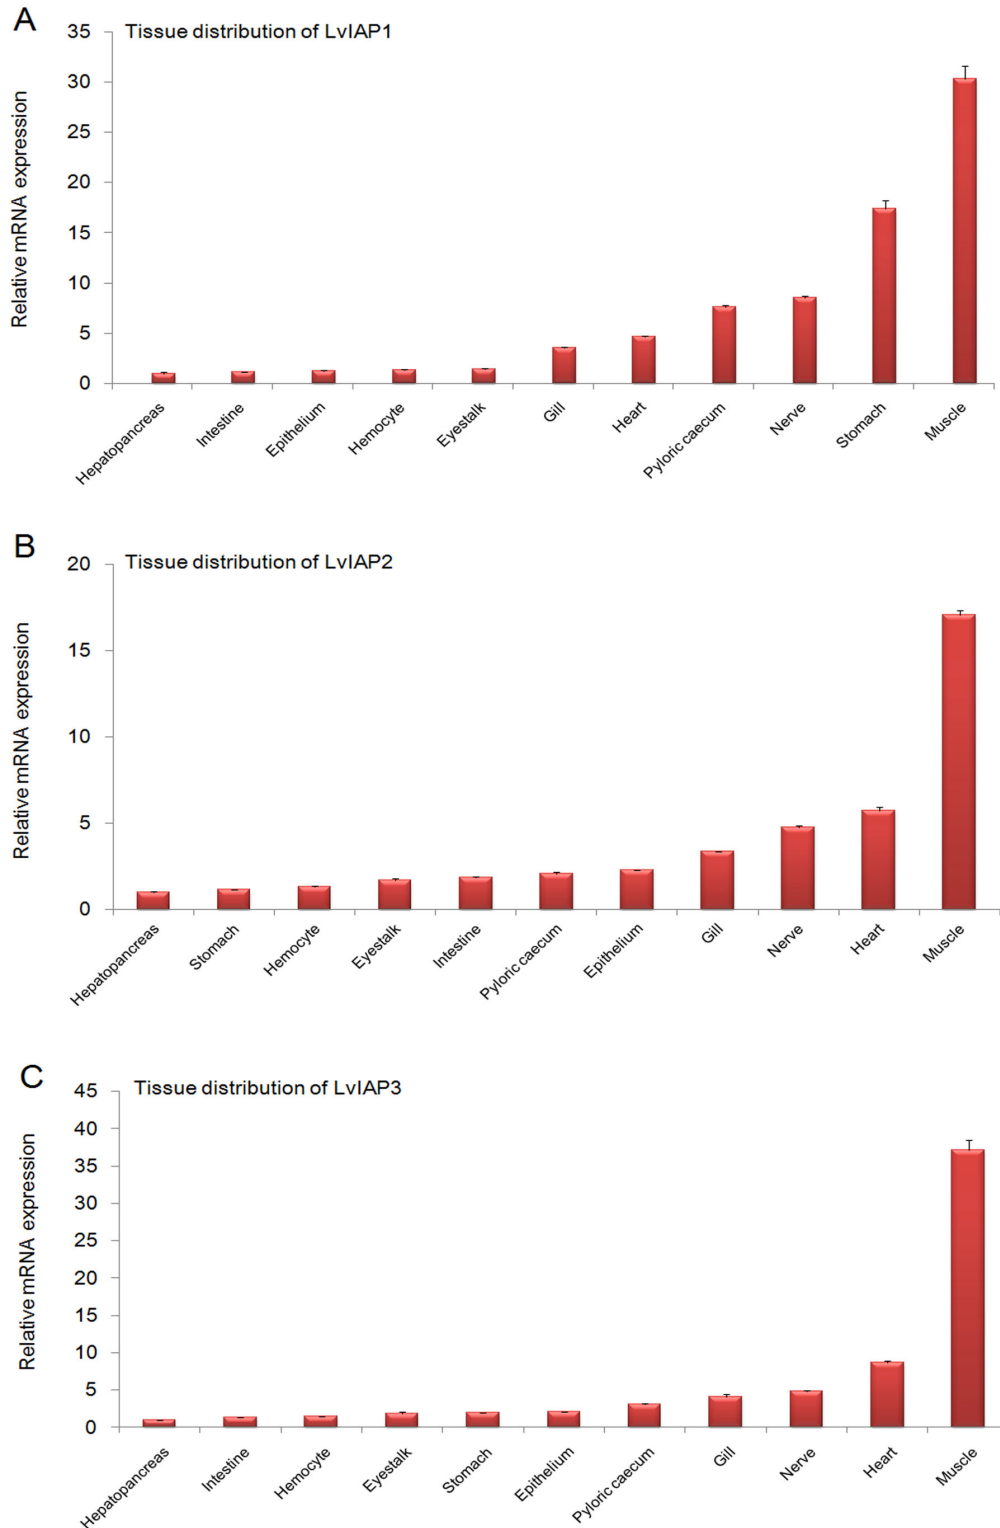

**Figure 3. Tissue distribution of *LvIAP1* (A), *LvIAP2* (B), and *LvIAP3* (C) in healthy shrimps.** The hemocytes, hepatopancreas, epithelium, intestine, eyestalk, stomach, gill, heart, pyloric cecum, nerve, and muscle were collected from healthy *L. vannamei* to extract total RNA for the tissue distribution analysis. The transcript expression levels of *LvIAP1-3* in the hepatopancreas were set to 1.0. The qPCR analysis was performed in triplicate for each sample. The data are expressed as the mean fold-changes (means  $\pm$  S.E., n =3).

doi: 10.1371/journal.pone.0072592.g003



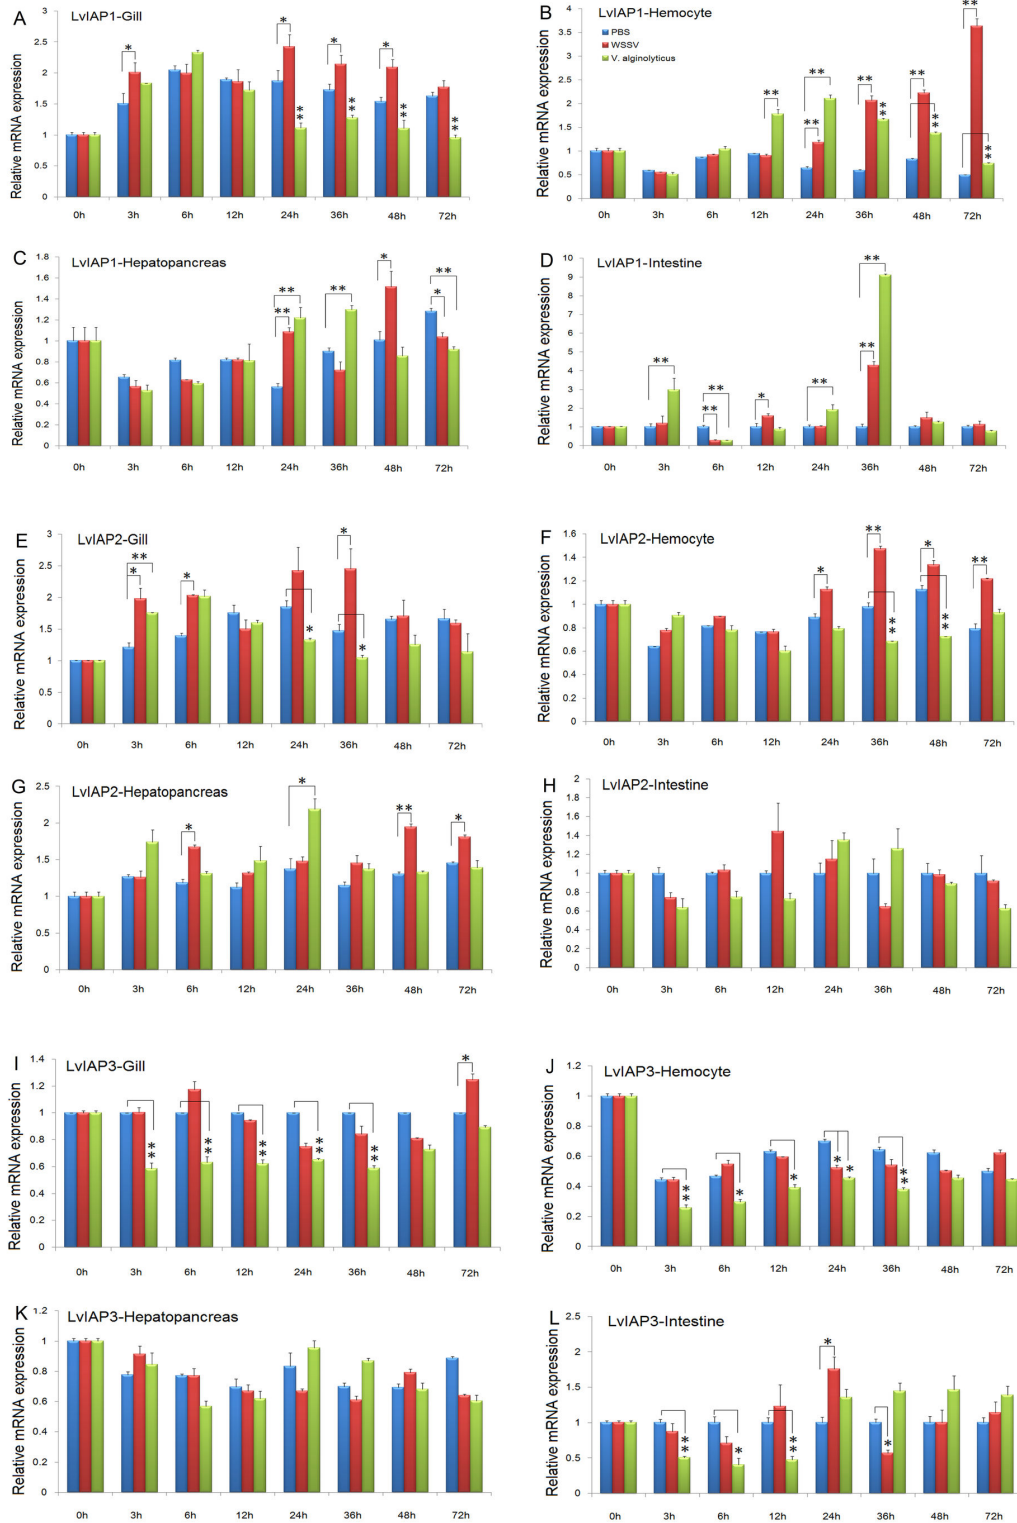

**Figure 4. Temporal expression of *LviAP1*, *LviAP2*, and *LviAP3* in the gill (A), hemocytes (B), hepatopancreas (C), and intestine (D) after PBS, WSSV, and *V. alginolyticus* infection.** Healthy *L. vannamei* were injected intramuscularly at the third abdominal segment with PBS (control group), *V. alginolyticus* or WSSV inoculums. At different time points, five shrimp from each group were randomly selected, and the gill, hemocytes, hepatopancreas, and intestine were collected for qPCR analysis. The transcript expression levels of *LviAP1-3* in the untreated control group (0 hpi) was set at 1.0 (\* $p < 0.05$ ; \*\* $p < 0.01$ ).

doi: 10.1371/journal.pone.0072592.g004

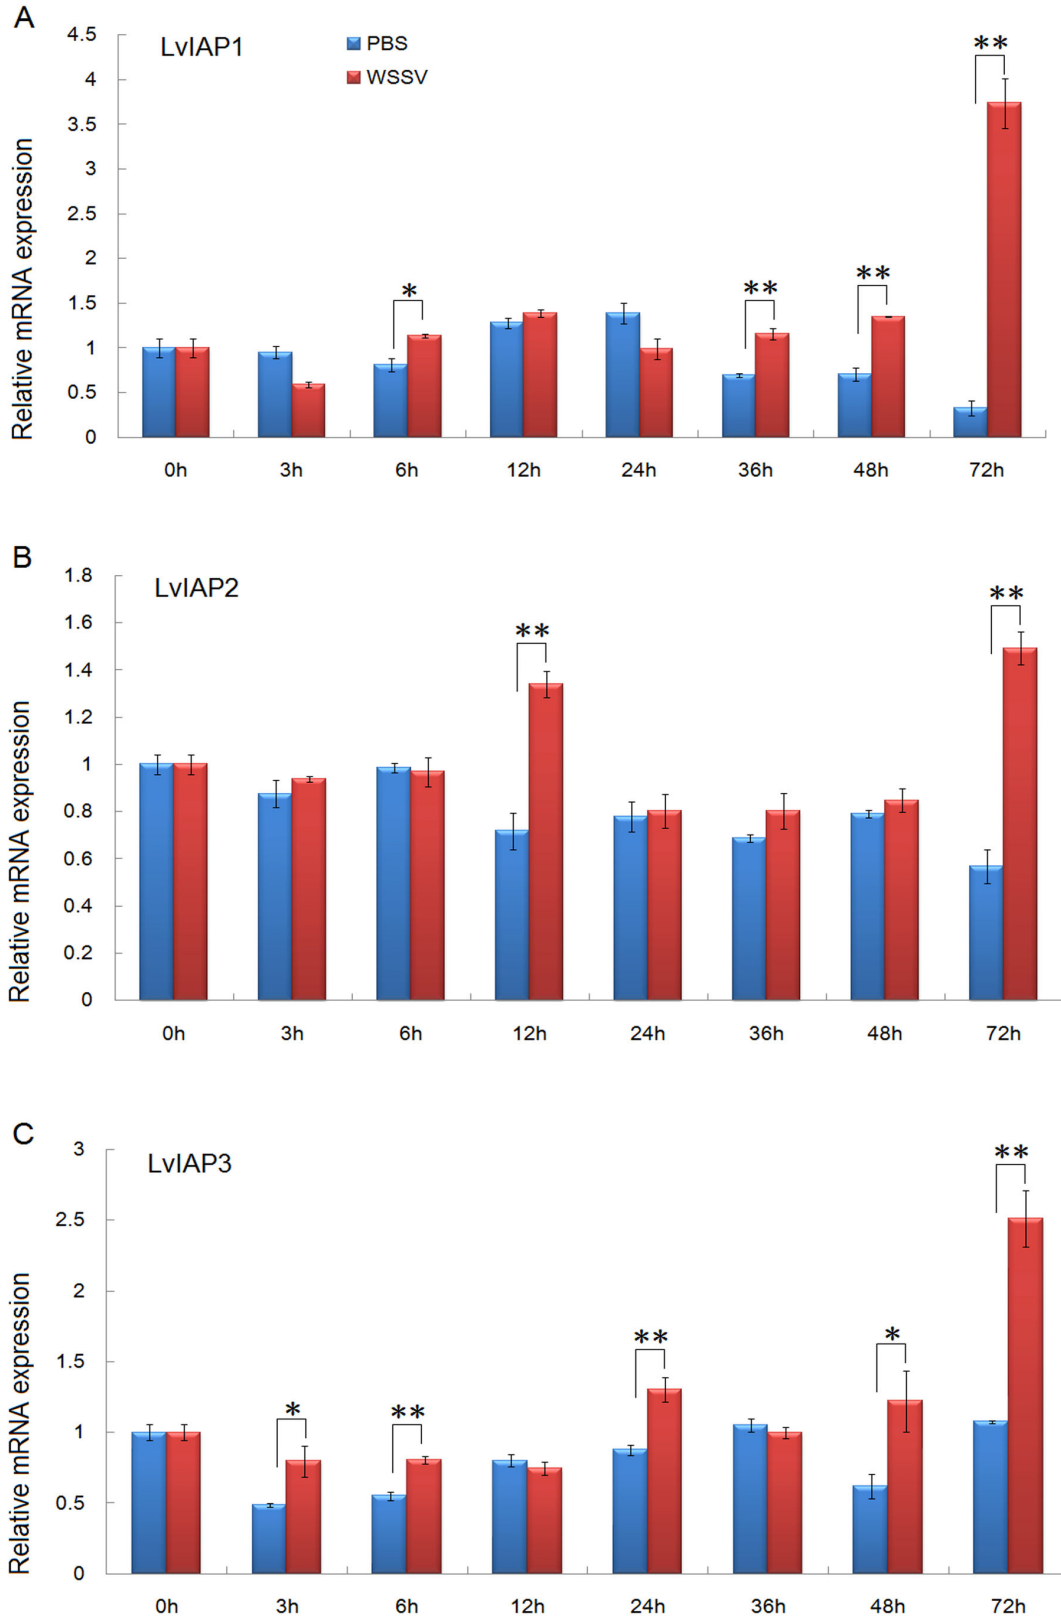

**Figure 5. Temporal expression of *LviAP1* (A), *LviAP2* (B), and *LviAP3* (C) in the muscle after PBS and WSSV injection.** *LviAP1-3* expression in the untreated control group (0 hpi) was set at 1.0.

doi: 10.1371/journal.pone.0072592.g005

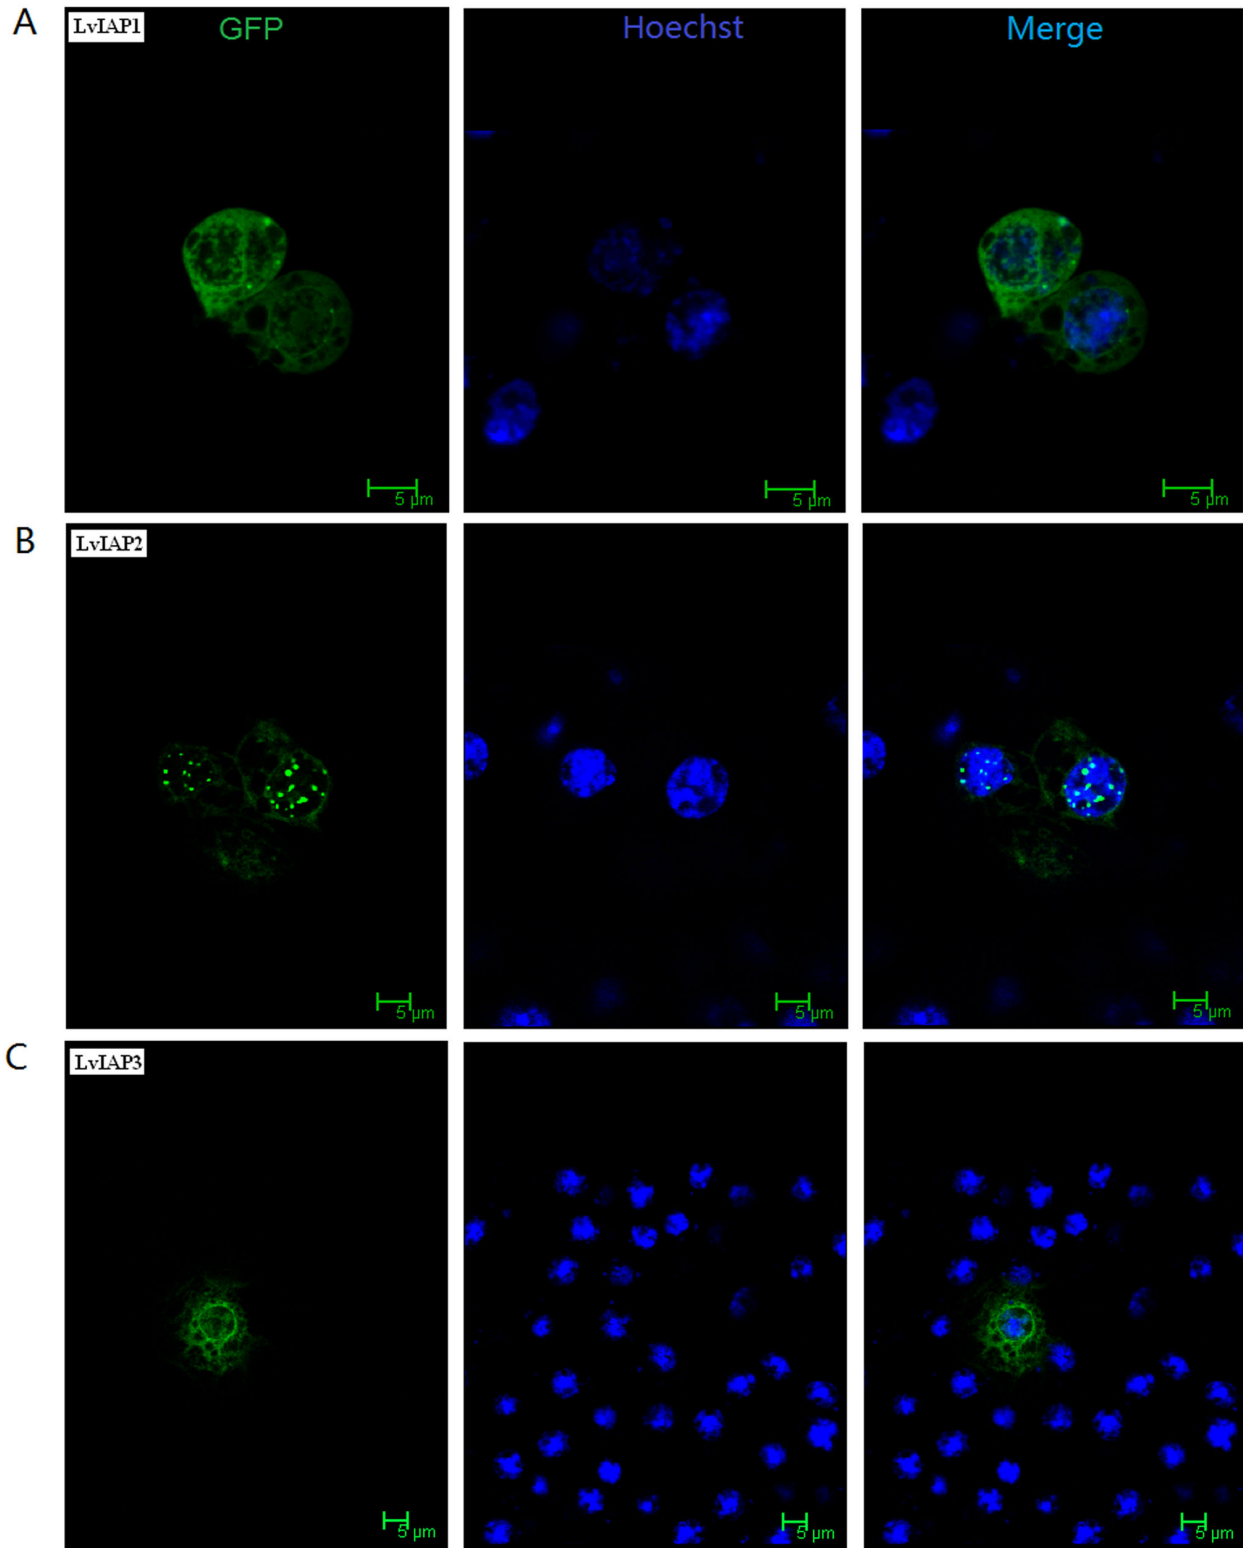

**Figure 6. Subcellular localization of LviIAP1 (A), LviIAP2 (B), and LviIAP3 (C) in *Drosophila* S2 cells.** *Drosophila* S2 cells were transfected with the pAc5.1-LviIAP1-3-GFP plasmids. At 36 hours post-transfection, the cover slips were washed, fixed, and stained with Hoechst 33258. The protein cellular localization was examined under a Leica laser scanning confocal microscope. The nuclei were visualized using the Hoechst stain (blue).

doi: 10.1371/journal.pone.0072592.g006

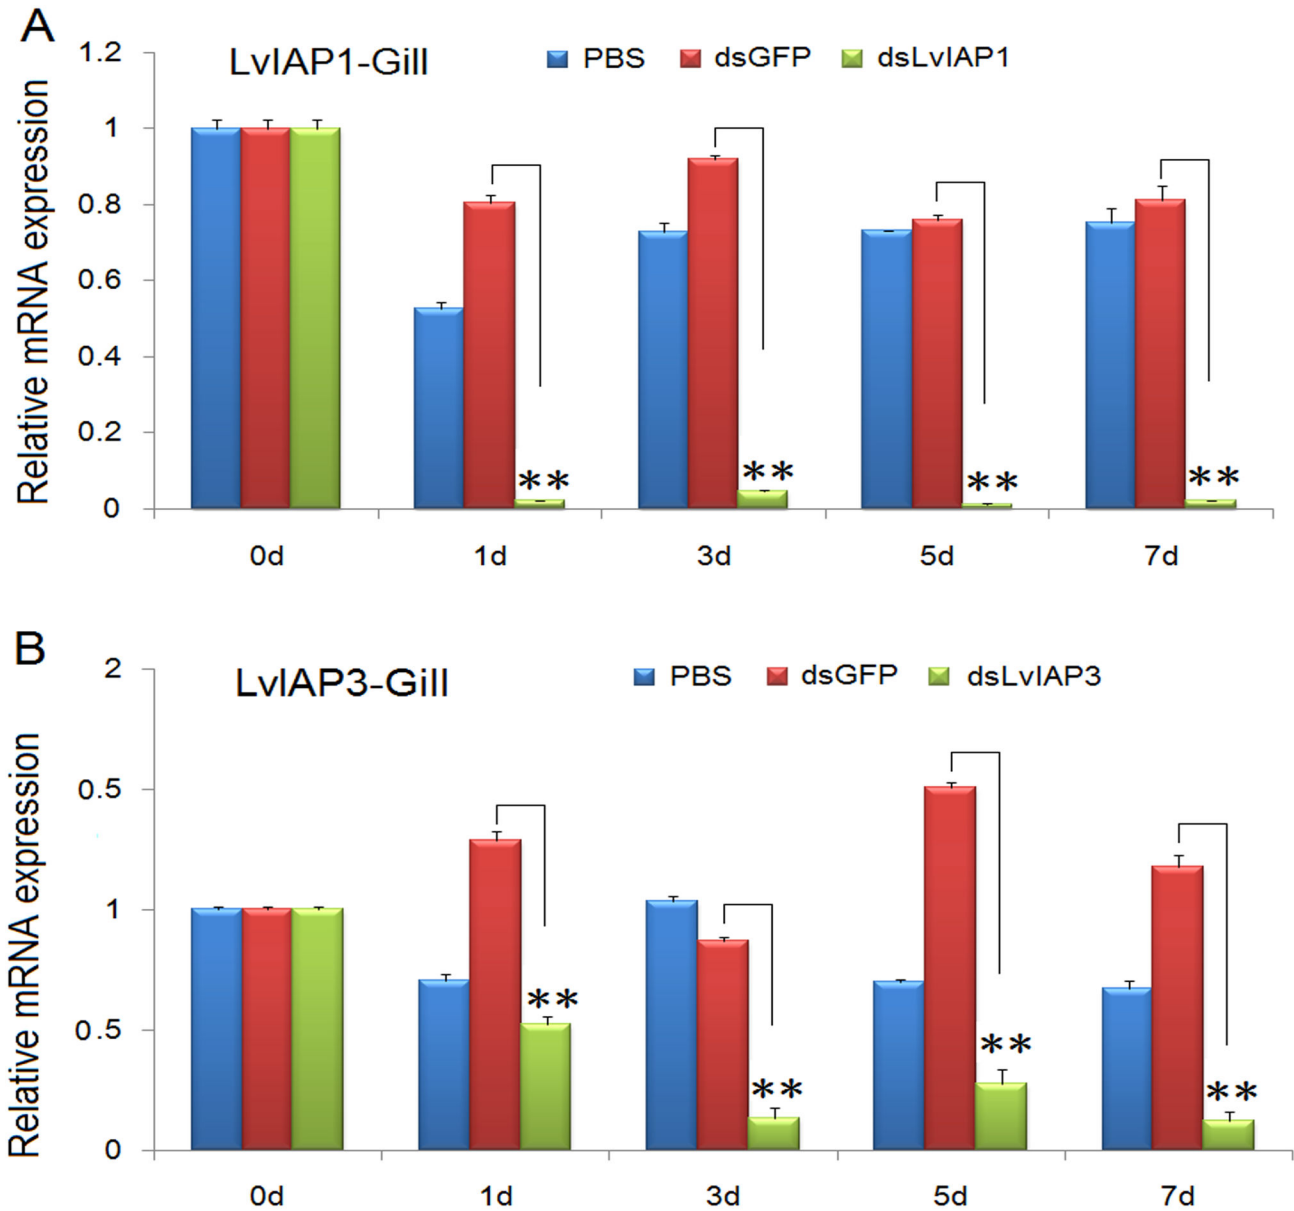

**Figure 7. RNAi silencing of *LvIAP1* and *LvIAP3* in the gill of shrimp by dsRNAs.** The experimental shrimp (1 g to 2 g) were intramuscularly injected with dsLvIAP1 or dsLvIAP3 (1  $\mu$ g/g shrimp), whereas the control shrimp were injected with dsGFP and PBS separately. At the indicated time points after injection, total RNA was extracted from the gill and reverse transcribed to cDNA. The expression of *LvIAP1* and *LvIAP3* was determined using qPCR. The expression of *LvIAP1* and *LvIAP3* in the untreated control group (0 hpi) was set at 1.0.

doi: 10.1371/journal.pone.0072592.g007

L). *LvIAP1-3* transcripts were significantly upregulated in the muscle after WSSV infection compared with the PBS-injected group (Figure 5). After *V. alginolyticus* infection, *LvIAP1* was downregulated in the gill but upregulated in the hemocyte, hepatopancreas, and intestine (Figure 4A–D); *LvIAP2* was downregulated in the gill and hemocyte (Figure 4E–H); and *LvIAP3* was downregulated in the gill, hemocyte, and intestine (Figure 4I–L).

### 3.5: Cellular localization of *LvIAP1-3* in *Drosophila* S2 cells

To examine the cellular localization of *LvIAP1-3*, *LvIAP1*, *LvIAP2*, and *LvIAP3* were fused to GFP using a pAc5.1–N–GFP vector and expression of fusion proteins were observed using confocal microscopy. Both *LvIAP1* and *LvIAP3* fusion proteins were widely distributed in the cytoplasm and nucleus of *Drosophila* S2 cells, whereas *LvIAP2* was distributed in the

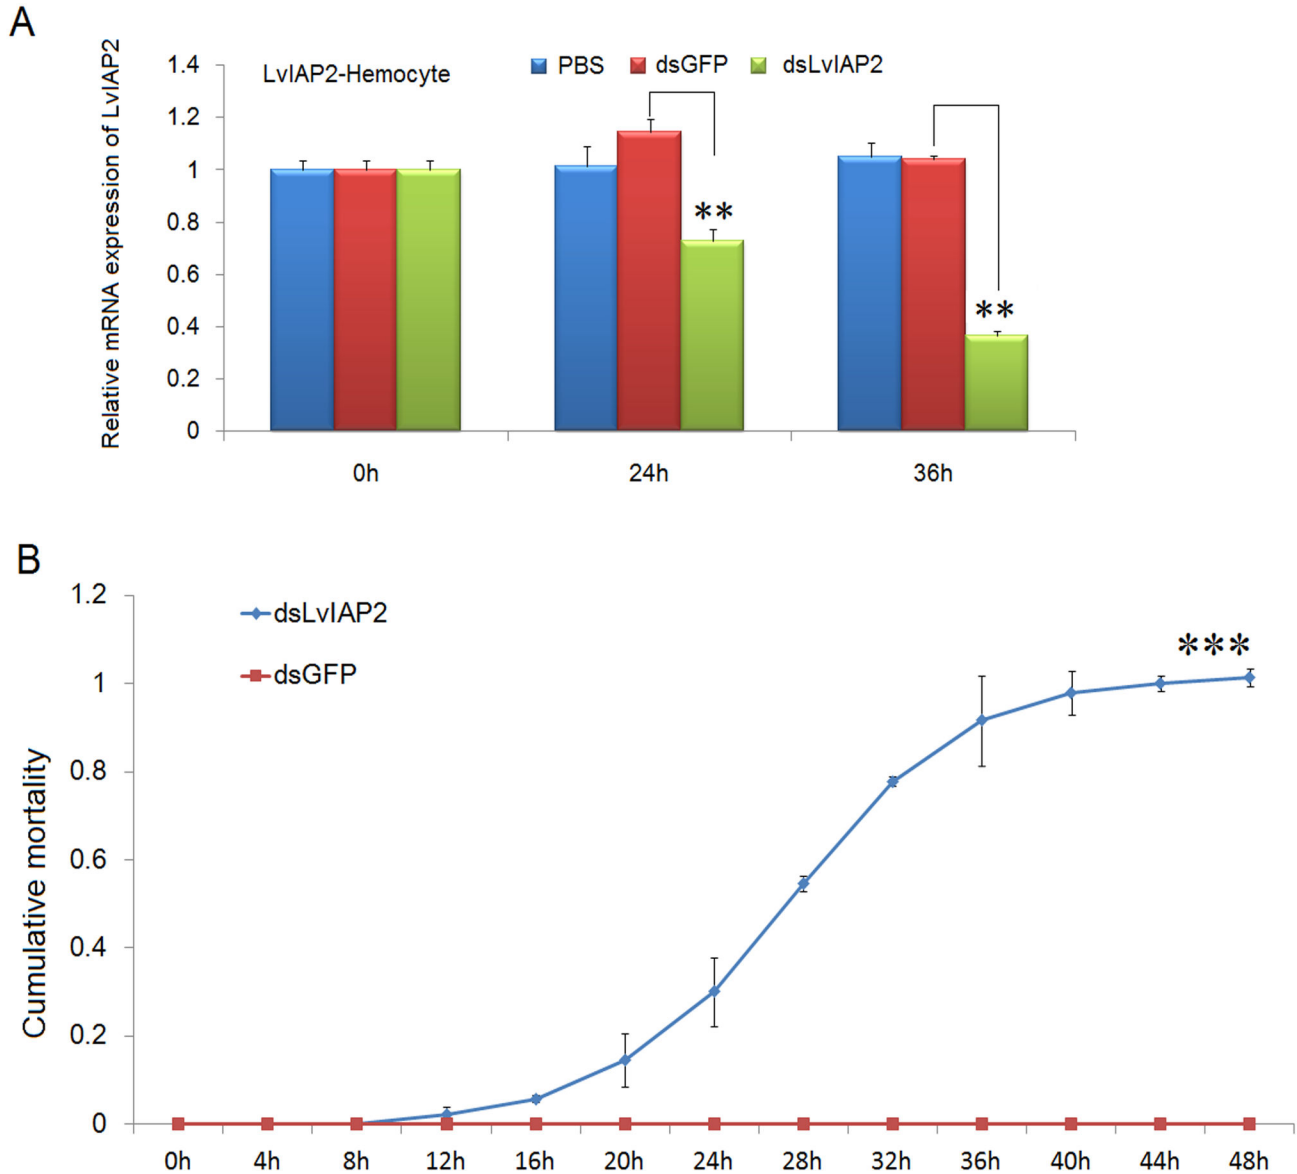

**Figure 8. Silencing of LviAP1 and LviAP3 facilitates the reproduction of WSSV.** At 48 hours after dsLviAP1, dsLviAP3, dsGFP or PBS injection, the shrimp were infected intramuscularly with a WSSV inoculum (107 copies/shrimp). At the indicated time points after WSSV infection, the gills of these shrimp were collected for qPCR analysis. The mRNA expression level of WSSV VP28 in the gills of shrimp injected with PBS, dsGFP (control), dsLviAP1, or dsLviAP3 after WSSV infection were determined using qPCR. The mRNA expression level of WSSV VP28 was normalized to that of *LvEF-1α* using the relative standard curve method for calculation of changes in gene expression as described in previous studies [43].

doi: 10.1371/journal.pone.0072592.g008

cytoplasm but appeared as speck-like aggregates in the nucleus (Figure 6).

**3.6: The reduced expression of LviAP1-3 in vivo by dsRNA-mediated gene silencing**

To investigate the function of *LviAP1-3* in shrimp defense against WSSV infection, dsRNA-mediated gene silencing experiments were performed. dsLviAP1-3 (1 μg/g shrimp) were

intramuscularly injected into shrimp separately, in the experimental groups, while injection of dsGFP or PBS was used in the control groups. In the gill, the expression of *LviAP1* and *LviAP3* was significantly suppressed at 24, 72, 120 and 144 hpi (Figure 7), while the expression of *LviAP2* was silenced in hemocytes, but not in the gill (Figure 8A). Intriguingly, the *LviAP2*-silenced shrimp died within 48 hours after dsLviAP2 injection (Figure 8B).

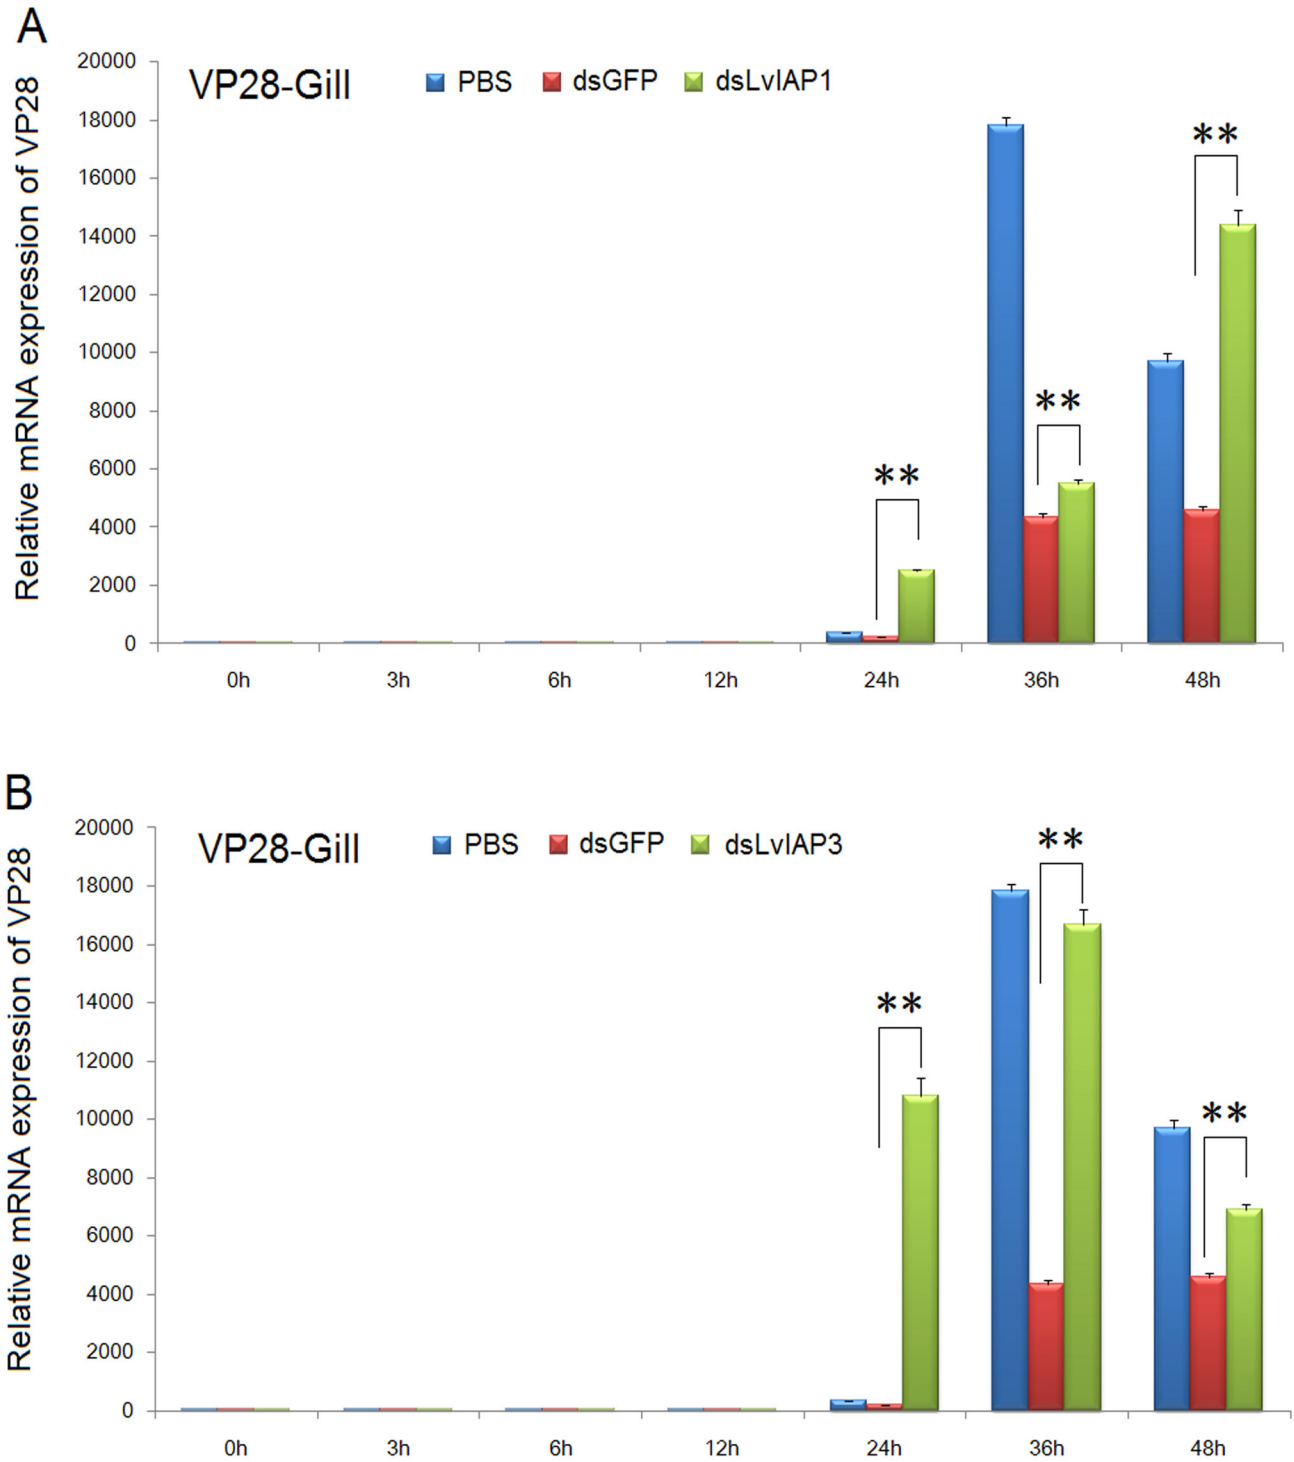

**Figure 9. Silencing of *LvIAP2* led to 100% mortality in *L. vannamei* within 48 hours.** (A) Expression of *LvIAP2* in the hemocyte of dsLvIAP2-injected shrimp was significantly suppressed by dsRNA-mediated RNAi. (B) The cumulative mortality rate of shrimp injected with dsGFP (control) or dsLvIAP2. The chi-square statistic was calculated to assess the differences in mortality rates by comparing the mortality of dsLvIAP2- injection group with that of the dsGFP- injection group (\*\* $p < 0.001$ ).

doi: 10.1371/journal.pone.0072592.g009

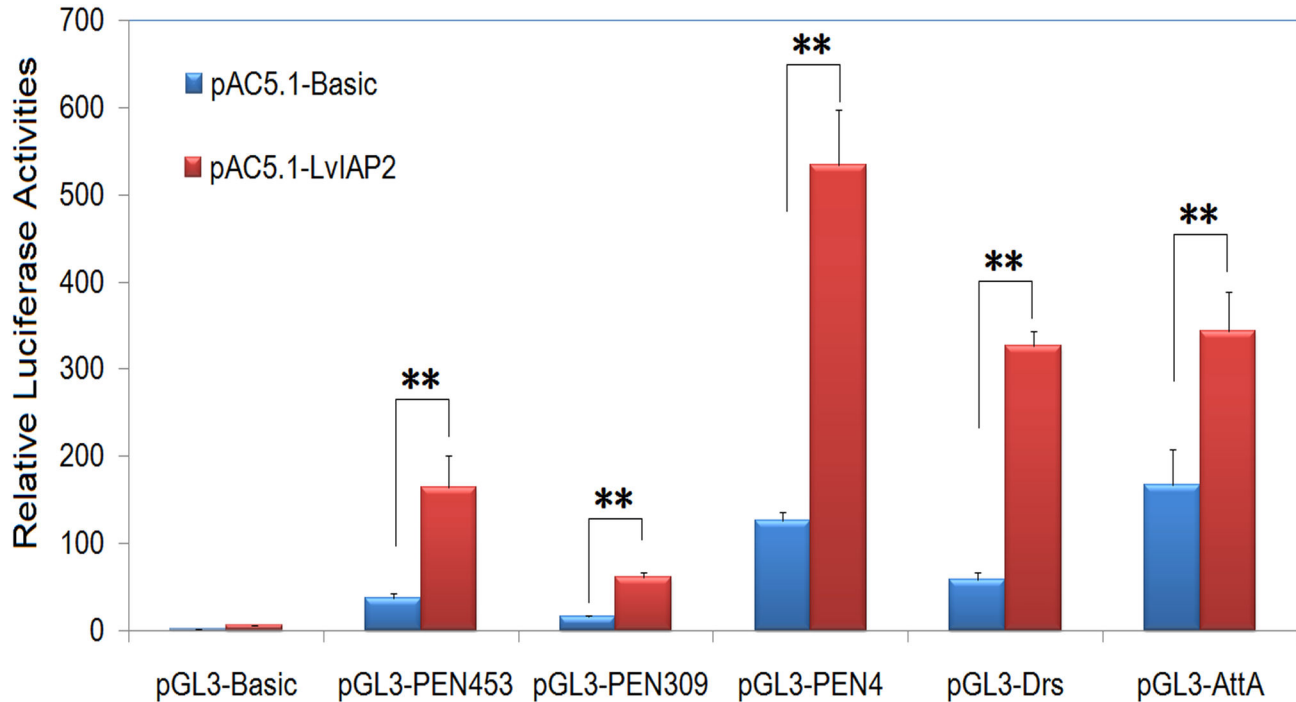

**Figure 10. Activation of the promoters of *Drosophila* and shrimp AMP genes by overexpression of LvIAP2 in *Drosophila* S2 cells.** *Drosophila* S2 cells were transfected with a protein expression vector (pAC5.1 empty vector or pAC5.1-LvIAP2 vector), a luciferase reporter plasmid (pGL3-Basic, pGL3-PEN453, pGL3-PEN309, pGL3-PEN4, pGL3-Drs, or pGL3-AttA), and pRL-TK *Renilla* luciferase plasmid (as an internal control) (Promega, USA). Thirty-six hours later, the cells were harvested for examination of luciferase activities using the dual luciferase reporter assay system (Promega, USA). All data are representative of three independent experiments. The bars indicate the mean  $\pm$  S.D. of the luciferase activity ( $n = 3$ ).

doi: 10.1371/journal.pone.0072592.g010

### 3.7: WSSV VP28 expression in dsRNA-injected *L. vannamei*

To further evaluate the role of LvIAP1 and LvIAP3 in shrimp defense against WSSV infection, we performed WSSV infection experiments in dsRNA-injected *L. vannamei*. At 48 hours after dsRNA injection, *L. vannamei* were infected with WSSV. We observed that at 24, 36 and 48 hpi, the expression of WSSV VP28 in the gill of the dsLvIAP1- and dsLvIAP3-injected groups was dramatically higher than that in the dsGFP- or PBS-injected group (Figure 9). At 24 hpi, the expression of VP28 was low in the PBS and dsGFP-injected groups, but in the dsLvIAP1- and dsLvIAP3-injected groups, the expression of VP28 was high, suggesting that the silencing of *LvIAP1* and *LvIAP3* accelerates WSSV infection (Figure 9). We also observed that at 24 and 36 hpi, the expression of WSSV VP28 was higher in *LvIAP1*-silenced shrimp than in *LvIAP3* silenced shrimp (Figure 9). In *LvIAP1*-silenced shrimp, WSSV VP28 was gradually increased, but in *LvIAP3*-silenced shrimp, the expression of WSSV VP28 diminished (Figure 9). These results suggest that *LvIAP1* and *LvIAP3* are involved in the host defense against WSSV infection differently.

### 3.8: The activation of the promoters of NF- $\kappa$ B pathway-controlled AMPs by LvIAP2 in *Drosophila* S2 cells

A comparison with four *Drosophila* IAPs (DIAPs) revealed that LvIAP2 is similar to DIAP1 and DIAP2 in domain structure and protein sequence (Figure 1D). DIAP1 plays an essential role in regulation of apoptosis, and DIAP2 is required for the IMD pathway in AMP regulation but is dispensable for *Drosophila* survival [16,53]. A previous study indicated that a shrimp IAP homolog of LvIAP2 evaluated in this study is essential for shrimp survival [42]. In this study, we investigated whether LvIAP2 functions in AMP regulation through the IMD-mediated NF- $\kappa$ B pathway in *Drosophila* S2 cells. The results of the dual luciferase reporter assays indicated that overexpression of LvIAP2 significantly induced the promoter activities of *Drosophila* AMPs, including *Drosomycin* (*Drs*) (5.57-fold) and *Attacin A* (*AttA*) (2.06-fold), *P. monodon* AMP *Penaeidin* (*PEN309* and *PEN453* at 3.76 and 4.47-fold, respectively), and *L. vannamei* AMP *Penaeidin4* (*PEN4*) (4.22-fold) (Figure 10). However, overexpression of neither LvIAP1 nor LvIAP3 affected the activities of these AMP promoters (result not shown).

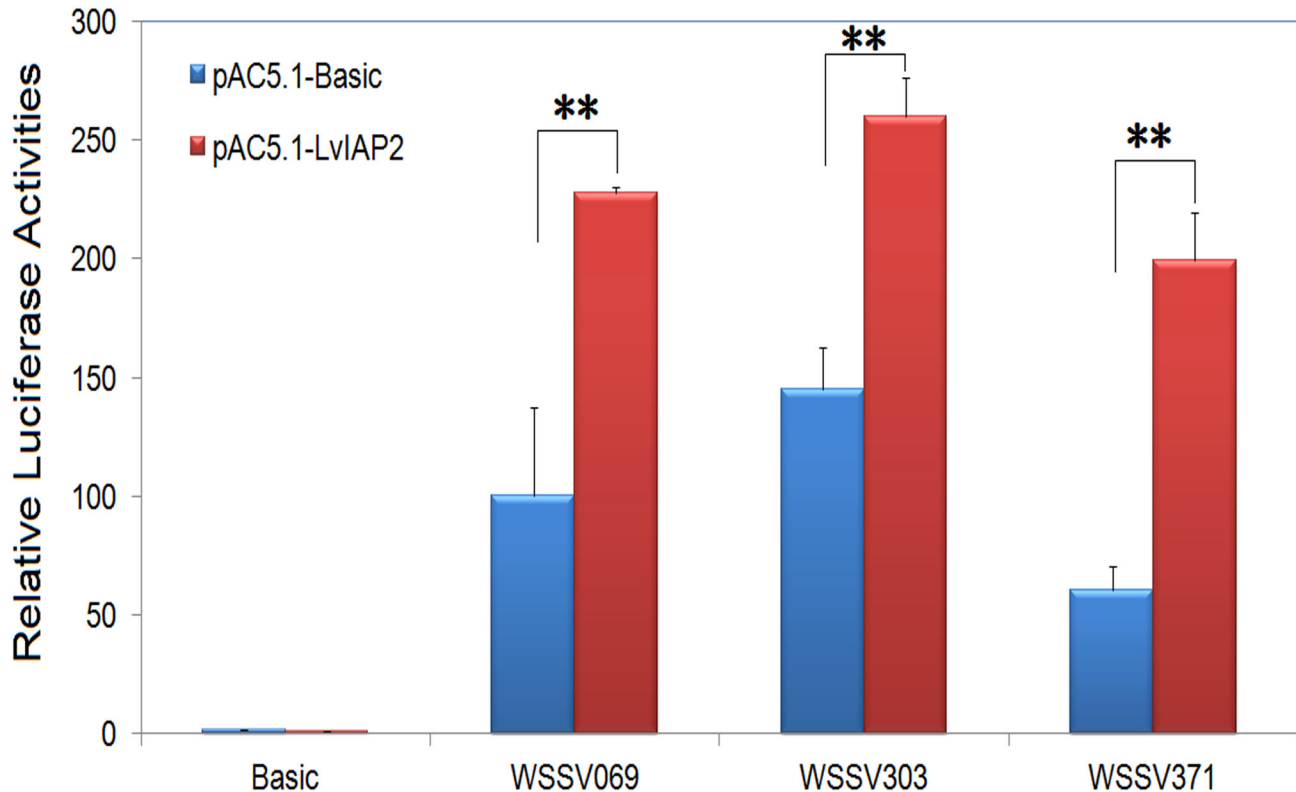

**Figure 11. Activation of the promoters of WSSV069 (*ie1*), WSSV303, and WSSV371 by overexpression of LvIAP2 in *Drosophila* S2 cells.**

doi: 10.1371/journal.pone.0072592.g011

### 3.9: The activation of the promoters of WSSV069, WSSV303, and WSSV371 by LvIAP2 in *Drosophila* S2 cells

In a previous study, we showed that several viral genes, including WSSV069, WSSV303, and WSSV371 that possess NF- $\kappa$ B binding sites in the promoter regions, were regulated through the NF- $\kappa$ B signaling pathway [48]. Here, we also showed that overexpression of LvIAP2 in *Drosophila* S2 cells activated the promoters of WSSV069 (*ie1*), WSSV303, and WSSV371 by 2.27-, 1.79-, and 3.30-fold, respectively (Figure 11).

### 3.10: The expression of LvPEN2-4, Lvlysozyme, Lvcrustin1-3, LvVICP1-2, and LvALF1-3 in LvIAP2-silenced shrimp

To further confirm LvIAP2's function in shrimp AMP regulation, we examined the expression of shrimp AMPs, including *PENs*, *lysozyme*, *crustins*, *VICPs*, and *ALFs*, in LvIAP2-silenced shrimp. We observed that in the hemocytes of LvIAP2-silenced shrimp, the expression of LvPEN2-4, Lvlysozyme, Lvcrustin1-3, and LvVICP1-2 was significantly reduced compared with that of dsGFP-injected shrimp at 24 and 36 hpi (Figure 12A–I). However, in the hemocytes of LvIAP2-silenced shrimp, the expression of LvALF1 was upregulated 1.97- and 17.08-fold at 24 and 36 hpi, respectively

(Figure 12J); the expression of LvALF2 was upregulated 1.65- and 3.13-fold at 24 and 36 hpi, respectively (Figure 12K); the expression of LvALF3 was upregulated 15.00- and 123.87-fold at 24 and 36 hpi, respectively (Figure 12L).

## Discussion

Apoptosis is a tightly regulated process in which excess or damaged cells are eliminated to maintain tissue homeostasis [1,3,6,21]. Apoptosis is also a major defense mechanism to remove unwanted and potentially dangerous cells, such as virus-infected cells [3,5,54,55]. Shrimps use apoptosis in defense against WSSV infection, and WSSV encodes two anti-apoptosis proteins, AAP-1 (ORF390 or WSSV449) and WSSV222, to subvert host apoptosis responses to facilitate viral replication [26,27,29,39]. Inhibitors of apoptosis proteins (IAPs) inhibit the activity of caspases, the primary executor of the apoptosis program, and play important roles in regulating the progression of apoptosis from insects to humans [1,6,56]. In addition to apoptosis regulation, IAPs also participate in diverse cellular activities, such as signal transduction, innate immunity, and mitosis [21,57,58]. In this study, three IAPs from *L. vannamei* (LvIAP1-3) were cloned and characterized. Using dsRNA-mediated gene silencing, we investigated the functions of IAPs in WSSV infection and shrimp AMP regulation.



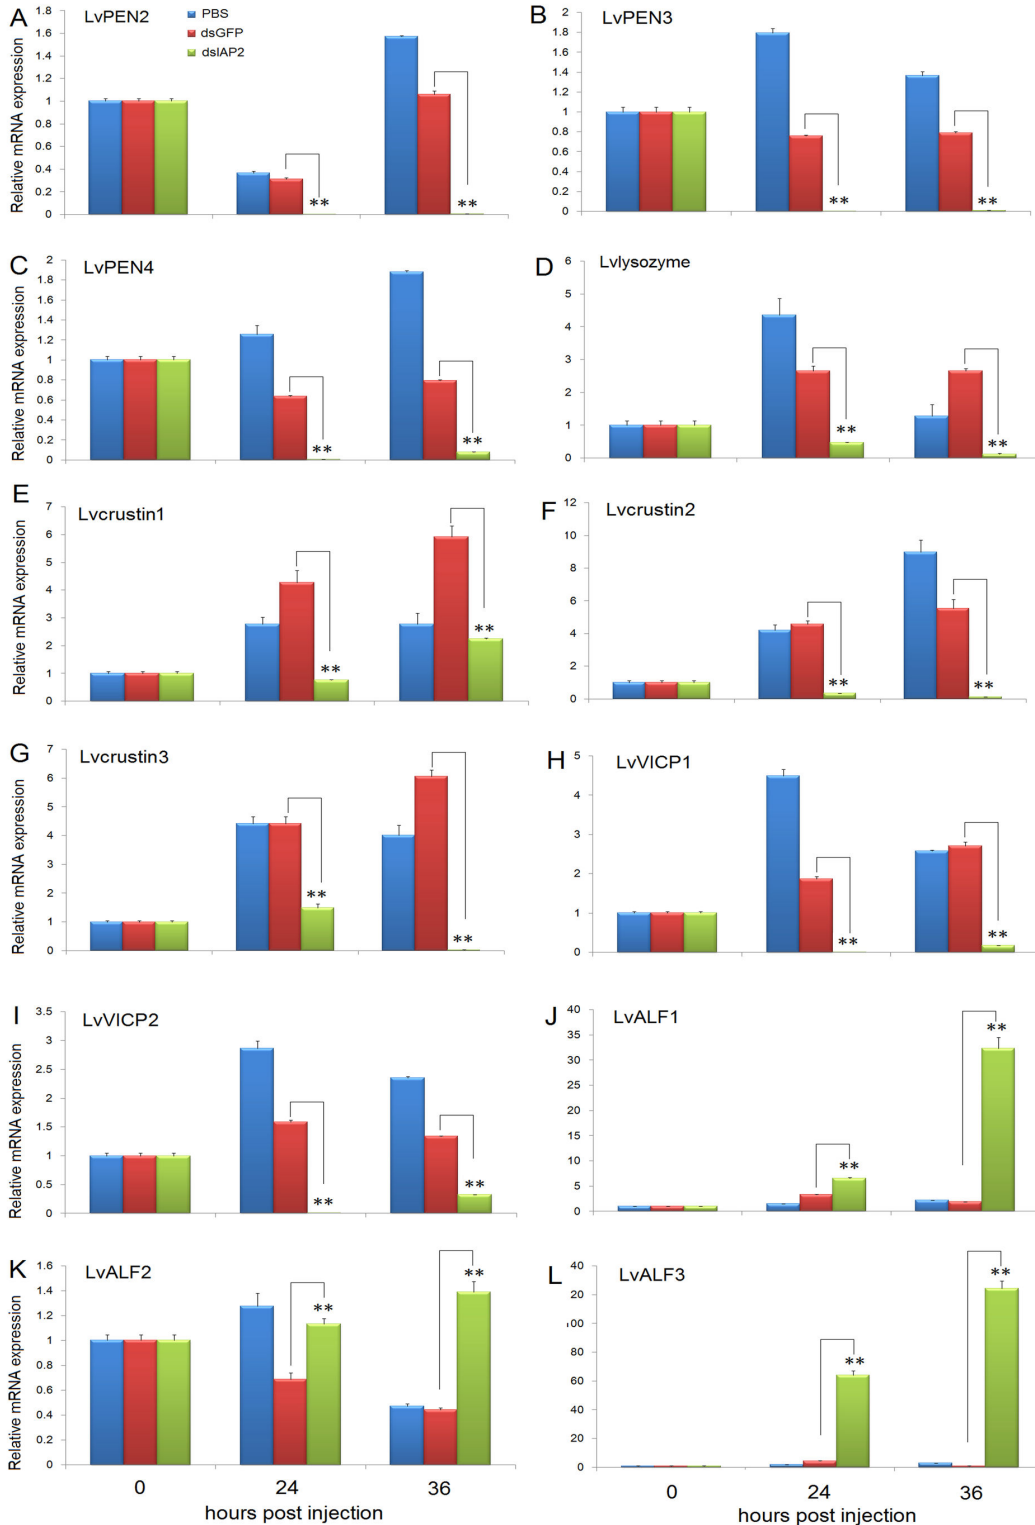

**Figure 12. Silencing of *LvIAP2* led to decrease in expression of *LvPEN2*, *LvPEN3*, *LvPEN4*, *Lvlysozyme*, *Lvcrustin1*, *Lvcrustin2*, *Lvcrustin3*, *LvVICP1*, and *LvVICP2* but increase in expression of *LvALF1*, *LvALF2*, and *LvALF3* in the hemocytes.** Shrimps were injected with PBS, dsGFP (control), or ds*LvIAP2*, and the hemocytes were collected at the indicated time points for total RNA isolation and first-stranded cDNA preparation. The expression levels of *LvPEN2*, *LvPEN3*, *LvPEN4*, *Lvlysozyme*, *Lvcrustin1*, *Lvcrustin2*, *Lvcrustin3*, *LvVICP1*, *LvVICP2*, *LvALF1*, *LvALF2*, and *LvALF3* were determined by qPCR.

doi: 10.1371/journal.pone.0072592.g012

*LvIAP1-3* mRNAs were primarily expressed in the muscle and upregulated after WSSV infection (Figures 3-5). After WSSV infection, *LvIAP1* was upregulated in the gill, hepatopancreas, hemocytes, and intestine (Figure 4); *LvIAP2* was upregulated in the gill, hepatopancreas, hemocytes, but not in the intestine (Figure 4); *LvIAP3* did not show significant changes (Figure 4). In *LvIAP1*- or *LvIAP3*-silenced shrimp, the expression of WSSV VP28 increased dramatically compared with that in the dsGFP control group (Figure 9), suggesting protective roles of *LvIAP1* and *LvIAP3* in shrimp defense against WSSV infection. In the present study, ds*LvIAP1* and ds*LvIAP3* were injected followed by WSSV infection. The silencing of *LvIAP1* and *LvIAP3* in the early stages during WSSV infection might promote apoptosis to facilitate the spread of virus progeny to neighboring cells. However, the detailed mechanism underlying this process needs further investigation (e.g., silencing *LvIAP1* and *LvIAP3* at different stages during WSSV infection and observing the replication of WSSV). Interestingly, *LvIAP2* was only effectively silenced in the hemocytes, but not in the gill, and the *LvIAP2*-silenced shrimp died within 48 hours after ds*LvIAP2* injection (Figure 8). This phenomenon was also observed in a recently published paper, in which the authors concluded that reduction in the number of hemocytes in *IAP2*-silenced shrimp reflects extensive apoptosis [42]. We also observed that the circulating hemocytes were dramatically reduced in *LvIAP2*-silenced shrimp (results not shown). Thus, hemocytes play a pivotal role in shrimp survival, and *LvIAP2* plays a central role in regulation of shrimp hemocyte apoptosis. *LvIAPs* were also cloned in a recent report [42] and the function of *LvIAP2* in shrimp haemocyte apoptosis is well studied. In this study, we investigated induced expression of *LvIAP1-3* by WSSV infection and their potential involvements in host defense against viral infection. Particularly, we further studied the function of *LvIAP2* in regulation of shrimp AMPs.

A comparison with four *Drosophila* IAPs (DIAPs) revealed that *LvIAP2* is structurally related to DIAP1 and DIAP2 and is most similar to DIAP2 (Figure 1). DIAP1 is essential for *Drosophila* cell survival *in vivo* and *in vitro*, whereas DIAP2 is required for the IMD pathway in AMP regulation, but is dispensable for *Drosophila* survival [16,53]. In the present study, we observed that, similar to DIAP2, *LvIAP2* activated the IMD pathway through the induction of the promoter activities of *Drosophila* and shrimp AMPs in *Drosophila* S2 cells (Figure 10). In addition, shrimp AMPs, such as *PENs*, *lysozyme*, *crustins*, *VICPs*, and *ALFs*, were significantly downregulated in the hemocytes of *LvIAP2*-silenced shrimp (Figure 12). The increase expression of *ALFs* might reflect different regulation mechanisms of various AMPs, which has also been recently observed in other studies [59]. The silencing of *Cactus* (a shrimp I $\kappa$ B homolog and potential negative regulator of the shrimp Toll pathway) in Chinese shrimp *Fenneropenaeus chinensis* downregulated *ALF* expression, consistent with the upregulation of *ALF* expression in the hemocytes of *LvIAP2*-silenced *L. vannamei* [59]. The silencing of *LvTollip*, a potential negative regulator of the shrimp Toll pathway, also downregulates the expression of another shrimp AMP, *PEN2* [60]. These results suggest that shrimp AMPs are regulated

through the Toll/IMD-NF- $\kappa$ B signaling pathway, but with different mechanisms. We propose that *ALFs* might have different regulation mechanisms from those of *PENs*, *lysozyme*, *crustins*, and *VICPs*.

In the present study, we cloned two new members of the recently identified shrimp AMP *VICPs* (*Vibrio penaeicidae*-induced cysteine and proline-rich peptide, called *Stylicins* in Pacific blue shrimp *Litopenaeus stylirostris*) [61]. *Litopenaeus stylirostris* *Stylicin* displays strong antifungal activity against *Fusarium oxysporum*, a pathogenic fungus of shrimp. The regulation of *LvVICPs* through *LvIAP2* might suggest that the shrimp IMD pathway is involved in antifungal responses. In *Drosophila*, the Toll pathway, but not the IMD pathway, primarily regulates antifungal and anti-Gram-positive bacterial responses [10,11]. Thus, the antibacterial and antifungal mechanisms might be different in the Toll and IMD pathways in *Drosophila* and shrimps. Notably, the expression of all the *ALFs*, including *LvALF1*, *LvALF2*, and *LvALF3*, was upregulated in the hemocytes of *LvIAP2*-silenced shrimp. Thus, *LvIAP2* might negatively regulate the expression of *ALFs*.

Although *LvIAP1-3* possess the characteristic baculoviral IAP repeat (BIR) domain, these proteins also differed in many aspects. *LvIAP1* has one BIR domain, similar to mammalian survivin and *Drosophila* deterin, whereas *LvIAP2* contains three BIR domains and a C-terminal RING domain. Therefore, *LvIAP2* is structurally similar to mammalian XIAP, cIAP1, and cIAP2 and *Drosophila* IAP2 (Figure 1D), which possess three BIR domains and a RING domain and are involved in NF- $\kappa$ B activation [7,8,21–24]. *LvIAP3* is a completely novel member of the IAP family proteins, with two BIR domains, which is not similar to any known mammalian or insect IAPs. Our results suggest that *LvIAP2* possesses dual functions in both the DIAP1-mediated apoptosis and DIAP2-mediated NF- $\kappa$ B activation of the IMD pathway [41,42]. Considering the protein identity and domain structure of *LvIAP2* and biological function in AMP regulation by *LvIAP2*, we propose that *LvIAP2* is the homolog of DIAP2, but not DIAP1. Therefore, we refer to this molecule as *LvIAP2* in the present study.

Apoptosis-related genes, such as *Pmcaspase*, have been targets of small molecule drugs to improve the apoptotic activity of shrimp hemocytes for the inhibition of WSSV infection [27,62]. Thus, in future studies, the detailed functions of shrimp IAPs in different stages during WSSV infection should be investigated to provide information for the development of drugs targeting shrimp IAPs to manipulate apoptosis as novel strategies for the prevention and control of WSSV infection.

## Supporting Information

**Figure S1. The promoter sequences (shaded regions) of *Drosophila* Attacin A (AttA), Drosomycin (Drs), *Litopenaeus vannamei* *Penaeidin4*, and *Penaes monodon* *penaeidin* (two types, PmPEN309 and PmPEN453) were shown. The primers used in luciferase reporter construction were also provided. Protocols for dual luciferase reporter assays are as followings:**

- 1) *Drosophila* S2 cells were maintained at 28°C in standard *Drosophila* medium (Serum-Free Medium; Invitrogen, USA), supplemented with 10% fetal bovine serum (FBS) and 1% Penicillin–Streptomycin solution.
- 2) Twenty-four hours prior to transfection, the cells were seeded in a 24-well culture plate in 2ml medium at 1×10<sup>6</sup> cells/ml.
- 3) Transfections were conducted using Effectene Transfection Reagent (Qiagen, Germany) following the protocols. The protein expression vector (pAc5.1-LvIAP2) was co-transfected with pGL3 luciferase vectors (pGL3-AttA, pGL3-Drs, pGL3-LvPEN4, pGL3-PmPEN453, pGL3-PmPEN309, pGL3-WSSV069, pGL3-WSSV303, or pGL3-WSSV371) to study the activation of the reporters by LvIAP2. The pRL-TK *Renilla* luciferase vector was used as an internal control.
- 4) *Drosophila* S2 cells were harvested and lysed 36 hours after transfection for examination of dual luciferase activities using the dual luciferase reporter assay system (Promega, USA).

(DOCX)

**Figure S2. cDNA sequences of WSSV VP28 and *Litopenaeus vannamei* AMPs including LvPEN2-4, Lvlysozyme, Lvcrustin1-3, LvALF1-3, and LvVICP1-2.** The qPCR primers are also provided and underlined in the cDNA sequences. The ORFs of AMPs were shaded.

(DOCX)

## Author Contributions

Conceived and designed the experiments: P-HW J-GH. Performed the experiments: P-HW D-HW Z-HG WQ Y-GC. Analyzed the data: P-HW. Contributed reagents/materials/analysis tools: S-PW X-QY. Wrote the manuscript: P-HW. Revised the draft: X-QY J-GH.

## References

1. Roulston A, Marcellus RC, Branton PE (1999) Viruses and apoptosis. *Annu Rev Microbiol* 53: 577-628. doi:10.1146/annurev.micro.53.1.577. PubMed: 10547702.
2. Shi YG (2002) Mechanisms of caspase activation and inhibition during apoptosis. *Mol Cell* 9: 459-470. doi:10.1016/S1097-2765(02)00482-3. PubMed: 11931755.
3. Hardwick JM (2001) Apoptosis in viral pathogenesis. *Cell Death Differ* 8: 109-110. doi:10.1038/sj.cdd.4400820. PubMed: 11313711.
4. Hengartner MO (2000) The biochemistry of apoptosis. *Nature* 407: 770-776. doi:10.1038/35037710. PubMed: 11048727.
5. Best SM (2008) Viral Subversion of Apoptotic Enzymes: Escape from Death Row. *Annu Rev Microbiol* 62: 171-192. doi:10.1146/annurev.micro.62.081307.163009. PubMed: 18729734.
6. Deveraux QL, Reed TC (1999) IAP family proteins - suppressors of apoptosis. *Genes Dev* 13: 239-252. doi:10.1101/gad.13.3.239. PubMed: 9990849.
7. Earnshaw WC, Martins LM, Kaufmann SH (1999) Mammalian caspases: Structure, activation, substrates, and functions during apoptosis. *Annu Rev Biochem* 68: 383-424. doi:10.1146/annurev.biochem.68.1.383. PubMed: 10872455.
8. Silke J, Meier P (2013) Inhibitor of Apoptosis (IAP) Proteins-Modulators of Cell Death and Inflammation. *Cold Spring Harb Perspect Biol* 5: ([MedlinePgn:]) PubMed: 23378585.
9. De Gregorio E, Spellman PT, Tzou P, Rubin GM, Lemaitre B (2002) The Toll and Imd pathways are the major regulators of the immune response in *Drosophila*. *EMBO J* 21: 2568-2579. doi:10.1093/emboj/21.11.2568. PubMed: 12032070.
10. Lemaitre B, Hoffmann J (2007) The host defense of *Drosophila melanogaster*. *Annu Rev Immunol* 25: 697-743. doi:10.1146/annurev.immunol.25.022106.141615. PubMed: 17201680.
11. Valanne S, Wang JH, Råmet M (2011) The *Drosophila* Toll signaling pathway. *J Immunol* 186: 649-656. doi:10.4049/jimmunol.1002302. PubMed: 21209287.
12. Sabin LR, Hanna SL, Cherry S (2010) Innate antiviral immunity in *Drosophila*. *Curr Opin Immunol* 22: 4-9. doi:10.1016/j.coi.2010.01.007. PubMed: 20137906.
13. Kemp C, Imler JL (2009) Antiviral immunity in *drosophila*. *Curr Opin Immunol* 21: 3-9. doi:10.1016/j.coi.2009.01.007. PubMed: 19223163.
14. Takeuchi O, Akira S (2009) Innate immunity to virus infection. *Immunol Rev* 227: 75-86. doi:10.1111/j.1600-065X.2008.00737.x. PubMed: 19120477.
15. Kleino A, Valanne S, Ulvila J, Kallio J, Myllymäki H et al. (2005) Inhibitor of apoptosis 2 and TAK1-binding protein are components of the *Drosophila* Imd pathway. *EMBO J* 24: 3423-3434. doi:10.1038/sj.emboj.7600807. PubMed: 16163390.
16. Huh JR, Foe I, Muro I, Chen CH, Seol JH et al. (2007) The *Drosophila* inhibitor of apoptosis (IAP) DIAP2 is dispensable for cell survival, required for the innate immune response to gram-negative bacterial infection, and can be negatively regulated by the Reaper/Hid/Grim family of IAP-binding apoptosis inducers. *J Biol Chem* 282: 2056-2068. PubMed: 17068333.
17. Gesellchen V, Kutenkeuler D, Steckel M, Pelte N, Boutros M (2005) An RNA interference screen identifies Inhibitor of Apoptosis Protein 2 as a regulator of innate immune signalling in *Drosophila*. *EMBO Rep* 6: 979-984. doi:10.1038/sj.embor.7400530. PubMed: 16170305.
18. Leulier F, Lhocine N, Lemaitre B, Meier P (2006) The *Drosophila* inhibitor of apoptosis protein DIAP2 functions in innate immunity and is essential to resist gram-negative bacterial infection. *Mol Cell Biol* 26: 7821-7831. doi:10.1128/MCB.00548-06. PubMed: 16894030.
19. Meinander A, Runchel C, Tenev T, Chen L, Kim CH et al. (2012) Ubiquitylation of the initiator caspase DREDD is required for innate immune signalling. *EMBO J* 31: 2770-2783. doi:10.1038/emboj.2012.121. PubMed: 22549468.
20. Falschlehner C, Boutros M (2012) Innate immunity: regulation of caspases by IAP-dependent ubiquitylation. *EMBO J* 31: 2750-2752. doi:10.1038/emboj.2012.148. PubMed: 22588080.
21. Gyrd-Hansen M, Meier P (2010) IAPs: from caspase inhibitors to modulators of NF-kappaB, inflammation and cancer. *Nat Rev Cancer* 10: 561-574. doi:10.1038/nrc2889. PubMed: 20651737.
22. Varfolomeev E, Blankenship JW, Wayson SM, Fedorova AV, Kayagaki N et al. (2007) IAP antagonists induce autoubiquitination of c-IAPs, NF-kappaB activation, and TNFalpha-dependent apoptosis. *Cell* 131: 669-681. doi:10.1016/j.cell.2007.10.030. PubMed: 18022362.
23. Lopez J, Meier P (2010) To fight or die - inhibitor of apoptosis proteins at the crossroad of innate immunity and death. *Curr Opin Cell Biol* 22: 872-881. doi:10.1016/j.cob.2010.08.025. PubMed: 20888210.
24. Gyrd-Hansen M, Darding M, Miasari M, Santoro MM, Zender L et al. (2008) IAPs contain an evolutionarily conserved ubiquitin-binding domain that regulates NF-kappaB as well as cell survival and oncogenesis. *Nat Cell Biol* 10: 1309-U1130. doi:10.1038/ncb1789. PubMed: 18931663.
25. Liu HP, Söderhäll K, Jiravanichpaisal P (2009) Antiviral immunity in crustaceans. *Fish Shellfish Immunol* 27: 79-88. doi:10.1016/j.fsi.2009.02.009. PubMed: 19223016.
26. Wang W, Zhang X (2008) Comparison of antiviral efficiency of immune responses in shrimp. *Fish Shellfish Immunol* 25: 522-527. doi:10.1016/j.fsi.2008.07.016. PubMed: 18721886.
27. Leu JH, Lin SJ, Huang JY, Chen TC, Lo CF (2012) A model for apoptotic interaction between white spot syndrome virus and shrimp. *Fish Shellfish Immunol* 34: 1011-1017. PubMed: 22683516.
28. Leu JH, Chen LL, Lin YR, Kou GH, Lo CF (2010) Molecular mechanism of the interactions between white spot syndrome virus anti-apoptosis protein AAP-1 (WSSV449) and shrimp effector caspase. *Dev Comp Immunol* 34: 1068-1074. doi:10.1016/j.dci.2010.05.010. PubMed: 20546774.
29. Wang ZM, Hu LB, Yi GH, Xu H, Qi YP et al. (2004) ORF390 of white spot syndrome virus genome is identified as a novel anti-apoptosis gene. *Biochem Biophys Res Commun* 325: 899-907. doi:10.1016/j.bbrc.2004.09.224. PubMed: 15541375.
30. Hameed Ass, Sarathi M, Sudhakaran R, Balasubramanian G, Musthaq SS (2006) Quantitative assessment of apoptotic hemocytes in white spot syndrome virus (WSSV)-infected penaeid shrimp, *Penaeus*

- monodon* and *Penaeus indicus*, by flow cytometric analysis. *Aquaculture* 256: 111-120. doi:10.1016/j.aquaculture.2006.02.054.
31. Wang L, Zhi B, Wu WL, Zhang XB (2008) Requirement for shrimp caspase in apoptosis against virus infection. *Dev Comp Immunol* 32: 706-715. doi:10.1016/j.dci.2007.10.010. PubMed: 18068223.
  32. Liu H, Jiravanichpaisal P, Söderhäll I, Cerenius L, Söderhäll K (2006) Antilipopolysaccharide factor interferes with white spot syndrome virus replication in vitro and in vivo in the crayfish *Pacifastacus leniusculus*. *J Virol* 80: 10365-10371. doi:10.1128/JVI.01101-06. PubMed: 17041217.
  33. Thamtada S, Ponprateep S, Somboonwivat K, Liu H, Söderhäll I et al. (2009) Role of anti-lipopolysaccharide factor from the black tiger shrimp, *Penaeus monodon*, in protection from white spot syndrome virus infection. *J Gen Virol* 90: 1491-1498. doi:10.1099/vir.0.009621-0. PubMed: 19264668.
  34. Tassanakajon A, Amparyup P, Somboonwivat K, Supungul P (2011) Cationic antimicrobial peptides in penaeid shrimp. *Mar Biotechnol* NY 13: 639-657. doi:10.1007/s10126-011-9381-8. PubMed: 21533916.
  35. Woramongkolchai N, Supungul P, Tassanakajon A (2011) The possible role of penaeidin5 from the black tiger shrimp, *Penaeus monodon*, in protection against viral infection. *Dev Comp Immunol* 35: 530-536. doi:10.1016/j.dci.2010.12.016. PubMed: 21199664.
  36. Wang KCHC, Kondo H, Hirono I, Aoki T (2010) The *Marsupenaeus japonicus* voltage-dependent anion channel (MjVDAC) protein is involved in white spot syndrome virus (WSSV) pathogenesis. *Fish Shellfish Immunol* 29: 94-103. doi:10.1016/j.fsi.2010.02.020. PubMed: 20202479.
  37. Tonganunt M, Nupan B, Saengsakda M, Suklour S, Wanna W et al. (2008) The role of Pm-fortilin in protecting shrimp from white spot syndrome virus (WSSV) infection. *Fish Shellfish Immunol* 25: 633-637. doi:10.1016/j.fsi.2008.08.006. PubMed: 18793729.
  38. Nupan B, Phongdara A, Saengsakda M, Leu JH, Lo CF (2011) Shrimp Pm-fortilin inhibits the expression of early and late genes of white spot syndrome virus (WSSV) in an insect cell model. *Dev Comp Immunol* 35: 469-475. doi:10.1016/j.dci.2010.11.016. PubMed: 21130805.
  39. He F, Fenner BJ, Godwin AK, Kwang J (2006) White spot syndrome virus open reading frame 222 encodes a viral E3 ligase and mediates degradation of a host tumor suppressor via ubiquitination. *J Virol* 80: 3884-3892. doi:10.1128/JVI.80.8.3884-3892.2006. PubMed: 16571805.
  40. Leu JH, Wang HC, Kou GH, Lo CF (2008) *Penaeus monodon* caspase is targeted by a white spot syndrome virus anti-apoptosis protein. *Dev Comp Immunol* 32: 476-486. doi:10.1016/j.dci.2007.08.006. PubMed: 17905432.
  41. Leu JH, Kuo YC, Kou GH, Lo CF (2008) Molecular cloning and characterization of an inhibitor of apoptosis protein (IAP) from the tiger shrimp, *Penaeus monodon*. *Dev Comp Immunol* 32: 121-133. doi:10.1016/j.dci.2007.05.005. PubMed: 17628672.
  42. Leu JH, Chen YC, Chen LL, Chen KY, Huang HT et al. (2012) *Litopenaeus vannamei* inhibitor of apoptosis protein 1 (LvIAP1) is essential for shrimp survival. *Dev Comp Immunol* 38: 78-87. doi:10.1016/j.dci.2012.04.006. PubMed: 22564858.
  43. Wang PH, Gu ZH, Wan DH, Zhu WB, Qiu W et al. (2013) *Litopenaeus vannamei* Sterile-Alpha and Armadillo Motif Containing Protein (LvSARM) Is Involved in Regulation of Penaeidins and antilipopolysaccharide factors. *PLOS ONE* 8: e52088. doi:10.1371/journal.pone.0052088. PubMed: 23405063.
  44. Wang PH, Wan DH, Gu ZH, Deng XX, Weng SP et al. (2011) *Litopenaeus vannamei* tumor necrosis factor receptor-associated factor 6 (TRAF6) responds to *Vibrio alginolyticus* and white spot syndrome virus (WSSV) infection and activates antimicrobial peptide genes. *Dev Comp Immunol* 35: 105-114. doi:10.1016/j.dci.2010.08.013. PubMed: 20816892.
  45. Wang PH, Liang JP, Gu ZH, Wan DH, Weng SP et al. (2012) Molecular cloning, characterization and expression analysis of two novel Toll (LvToll2 and LvToll3) and three putative Spatzle-like Toll ligands (LvSpz1-3) from *Litopenaeus vannamei*. *Dev Comp Immunol* 36: 359-371. doi:10.1016/j.dci.2011.07.007. PubMed: 21827783.
  46. Wang PH, Wan DH, Pang LR, Gu ZH, Qiu W et al. (2012) Molecular cloning, characterization and expression analysis of the tumor necrosis factor (TNF) superfamily gene, TNF receptor superfamily gene and lipopolysaccharide-induced TNF-alpha factor (LITAF) gene from *Litopenaeus vannamei*. *Dev Comp Immunol* 36: 39-50. doi:10.1016/j.dci.2011.06.002. PubMed: 21736897.
  47. Wang PH, Gu ZH, Huang XD, Liu BD, Deng XX et al. (2009) An immune deficiency homolog from the white shrimp, *Litopenaeus vannamei*, activates antimicrobial peptide genes. *Mol Immunol* 46: 1897-1904. doi:10.1016/j.molimm.2009.01.005. PubMed: 19232438.
  48. Wang PH, Gu ZH, Wan DH, Zhang MY, Weng SP et al. (2011) The shrimp NF-kappaB pathway is activated by white spot syndrome virus (WSSV) 449 to facilitate the expression of WSSV069 (ie1), WSSV303 and WSSV371. *PLOS ONE* 6: e24773. doi:10.1371/journal.pone.0024773. PubMed: 21931849.
  49. Ho SH, Song YL (2009) Cloning of penaeidin gene promoter in tiger shrimp (*Penaeus monodon*). *Fish Shellfish Immunol* 27: 73-77. doi:10.1016/j.fsi.2009.05.001. PubMed: 19439182.
  50. Huang XD, Yin ZX, Jia XT, Liang JP, Ai HS et al. (2010) Identification and functional study of a shrimp Dorsal homologue. *Dev Comp Immunol* 34: 107-113. doi:10.1016/j.dci.2009.08.009. PubMed: 19723535.
  51. Li F, Wang D, Li S, Yan H, Zhang J et al. (2010) A Dorsal homologue (FcDorsal) in the Chinese shrimp *Fenneropenaeus chinensis* is responsive to both bacteria and WSSV challenge. *Dev Comp Immunol* 34: 874-883. doi:10.1016/j.dci.2010.03.008. PubMed: 20363249.
  52. O'Leary NA, Gross PS (2006) Genomic structure and transcriptional regulation of the penaeidin gene family from *Litopenaeus vannamei*. *Gene* 371: 75-83. doi:10.1016/j.gene.2005.11.028. PubMed: 16488092.
  53. Wang SL, Hawkins CJ, Yoo SJ, Müller HA, Hay BA (1999) The Drosophila caspase inhibitor DIAP1 is essential for cell survival and is negatively regulated by HID. *Cell* 98: 453-463. doi:10.1016/S0092-8674(00)81974-1. PubMed: 10481910.
  54. Tschopp J, Thome M, Hofmann K, Meink E (1998) The fight of viruses against apoptosis. *Curr Opin Genet Dev* 8: 82-87. doi:10.1016/S0959-437X(98)80066-X. PubMed: 9529610.
  55. Galluzzi L, Brenner C, Morselli E, Touat Z, Kroemer G (2008) Viral control of mitochondrial apoptosis. *PLOS Pathog* 4: e1000018. PubMed: 18516228.
  56. Youle RJ, Strasser A (2008) The BCL-2 protein family: opposing activities that mediate cell death. *Nat Rev Mol Cell Biol* 9: 47-59. doi:10.1038/nrm2308. PubMed: 18097445.
  57. Rumble JM, Duckett CS (2008) Diverse functions within the IAP family. *J Cell Sci* 121: 3505-3507. doi:10.1242/jcs.040303. PubMed: 18946021.
  58. Galluzzi L, Kepp O, Trojel-Hansen C, Kroemer G (2012) Non-apoptotic functions of apoptosis-regulatory proteins. *EMBO Rep* 13: 322-330. doi:10.1038/embor.2012.19. PubMed: 22402666.
  59. Wang D, Li F, Li S, Chi Y, Wen R et al. (2013) An IkappaB homologue (FcCactus) in Chinese shrimp *Fenneropenaeus chinensis*. *Dev Comp Immunol* 39: 352-362. doi:10.1016/j.dci.2012.12.005. PubMed: 23276882.
  60. Wang PH, Gu ZH, Wan DH, Zhu WB, Qiu W et al. (2013) *Litopenaeus vannamei* Toll-interacting protein (LvTollip) is a potential negative regulator of the shrimp Toll pathway involved in the regulation of the shrimp antimicrobial peptide gene penaeidin-4 (PEN4). *Dev Comp Immunol*, 40: 266-77. doi:10.1016/j.dci.2013.02.011. PubMed: 23500511. PubMed: 23500511.
  61. Rolland JL, Abdelouahab M, Dupont J, Lefevre F, Bachère E et al. (2010) Stylicins, a new family of antimicrobial peptides from the Pacific blue shrimp *Litopenaeus stylirostris*. *Mol Immunol* 47: 1269-1277. doi:10.1016/j.molimm.2009.12.007. PubMed: 20061030.
  62. Zhi B, Tang W, Zhang XB (2011) Enhancement of Shrimp Antiviral Immune Response Through Caspase-Dependent Apoptosis by Small Molecules. *Mar Biotechnol* NY 13: 575-583. doi:10.1007/s10126-010-9328-5. PubMed: 20936319.
